# Supplementary material for: Empirical Evaluation of Alternative Time-Series Models for COVID-19 Forecasting in Saudi Arabia
Source: MDPI journal article supplement (doi:10.3390/ijerph18168660), 2021-08-16

# Forecasted cases for all models with the prediction periods

[The dark blue areas are the 80% prediction periods, and the light blue are the 95% prediction periods]

## 1- confirmed cases in Saudi Arabia

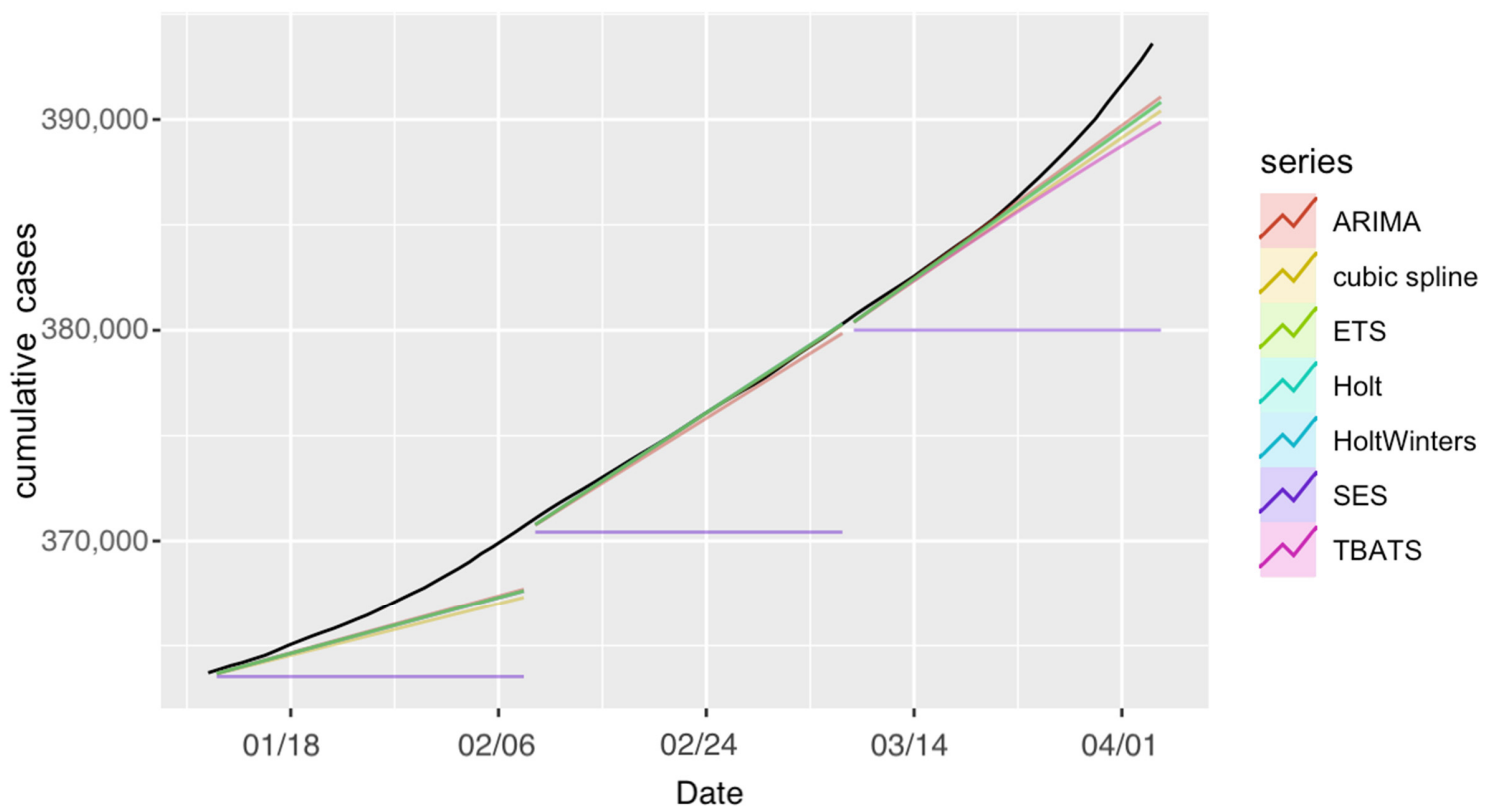

The left side of this figure is trimmed to have better visualization wherein we have forecasting periods

**(a)ARIMA**

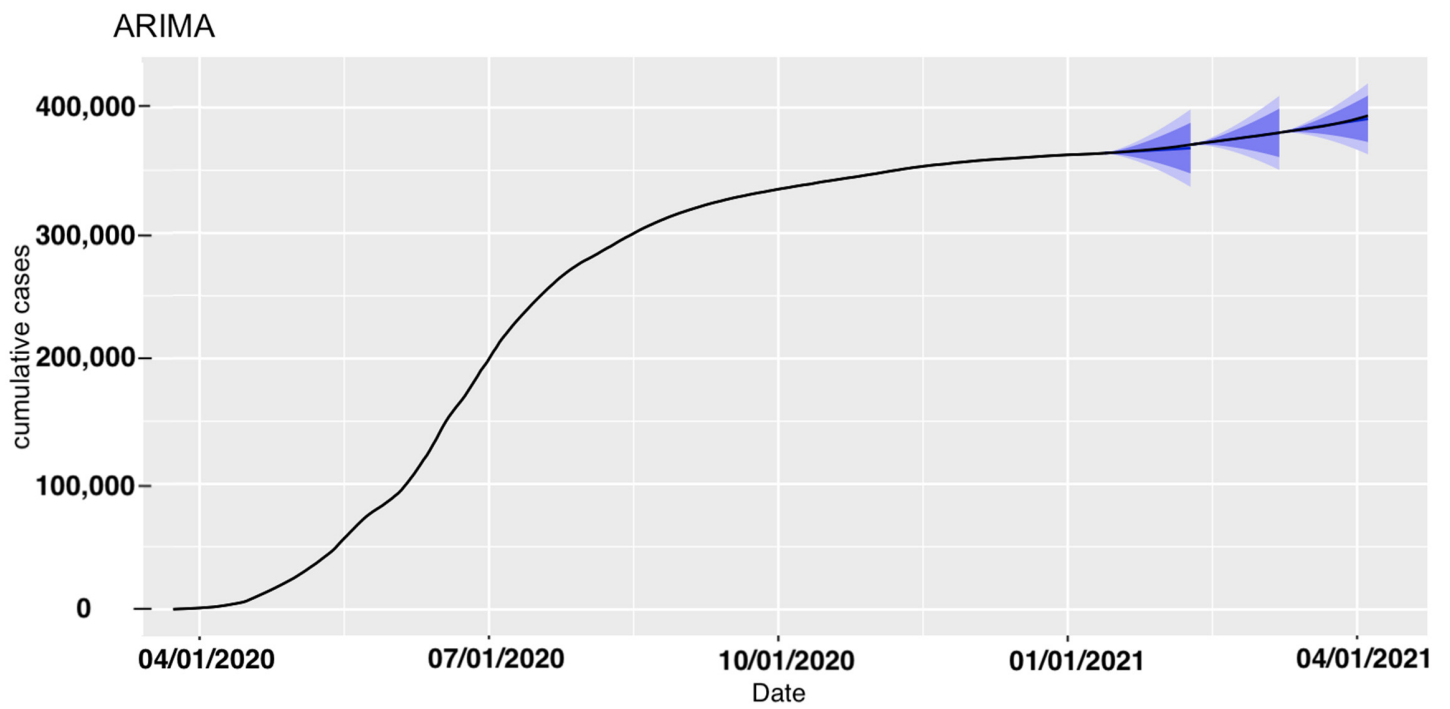

**(b)TBATS**

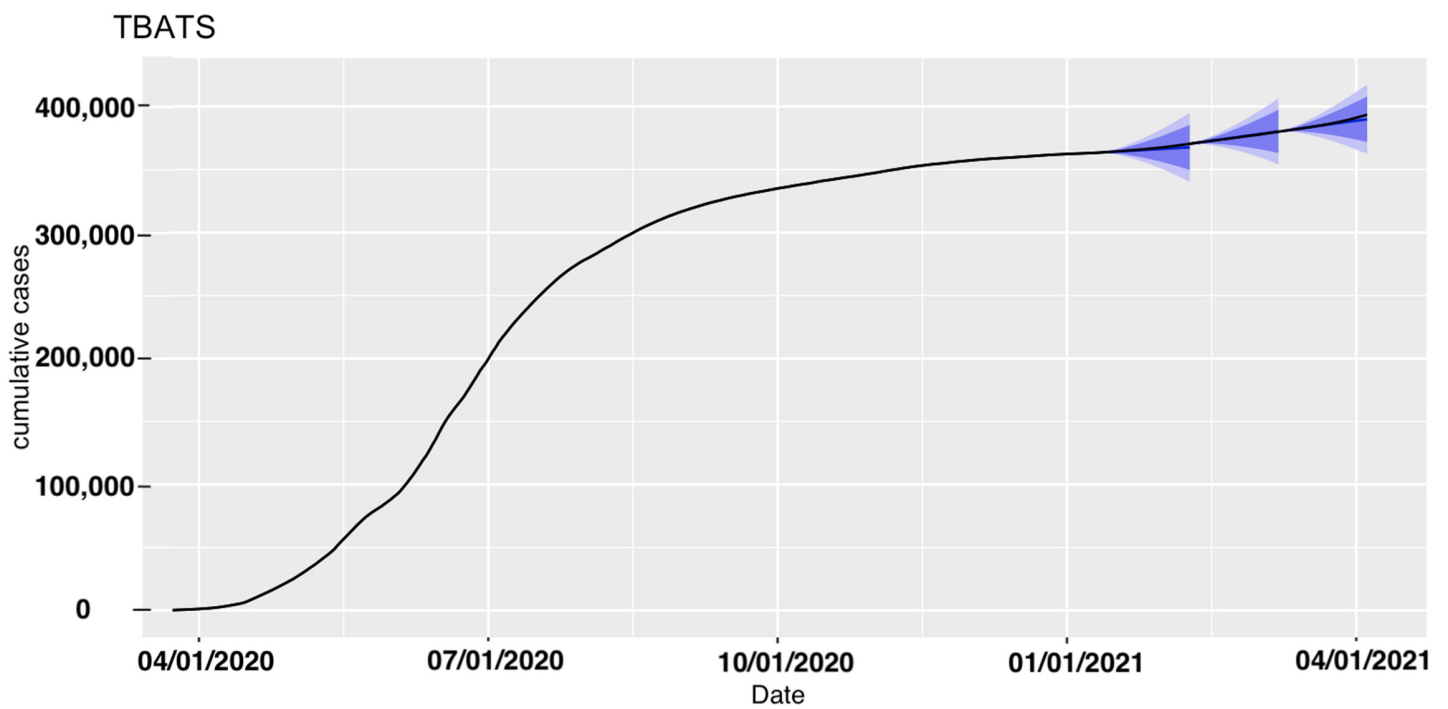

(c)ETS

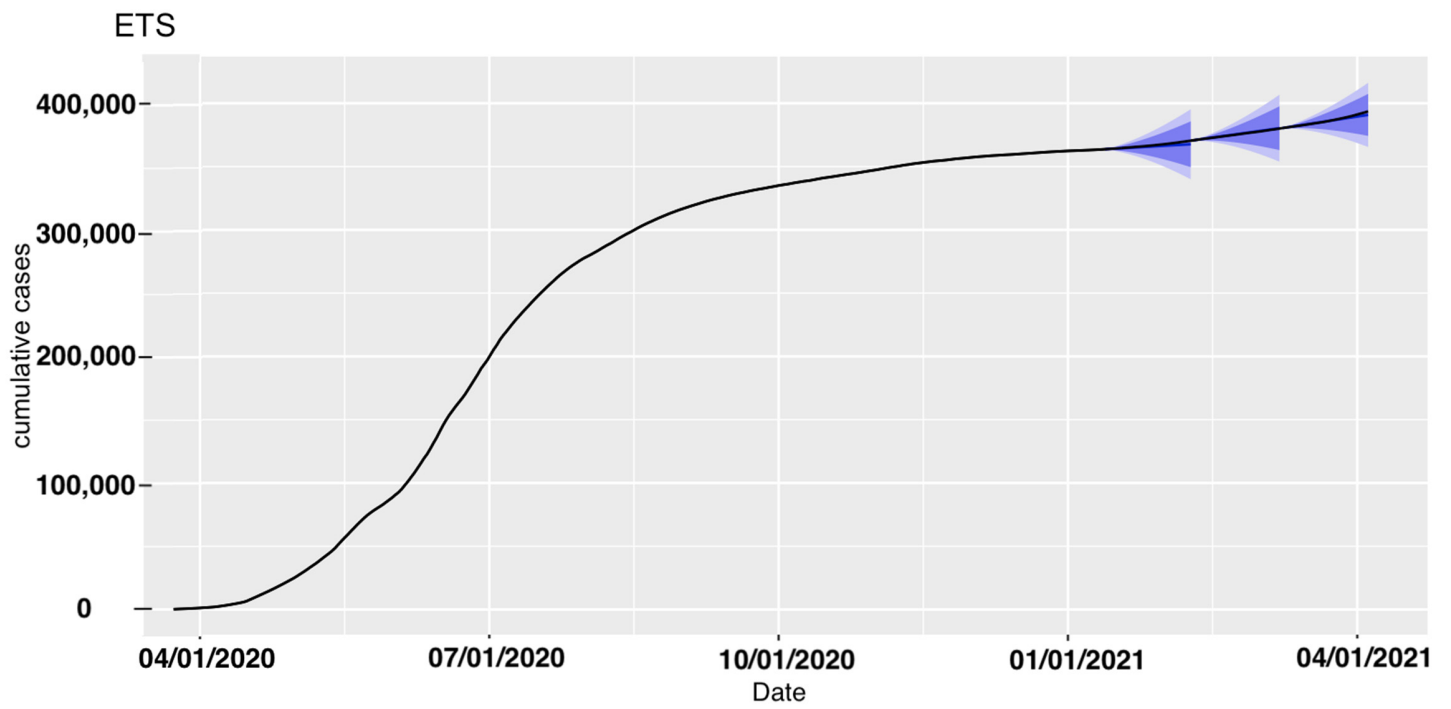

(d)Holt

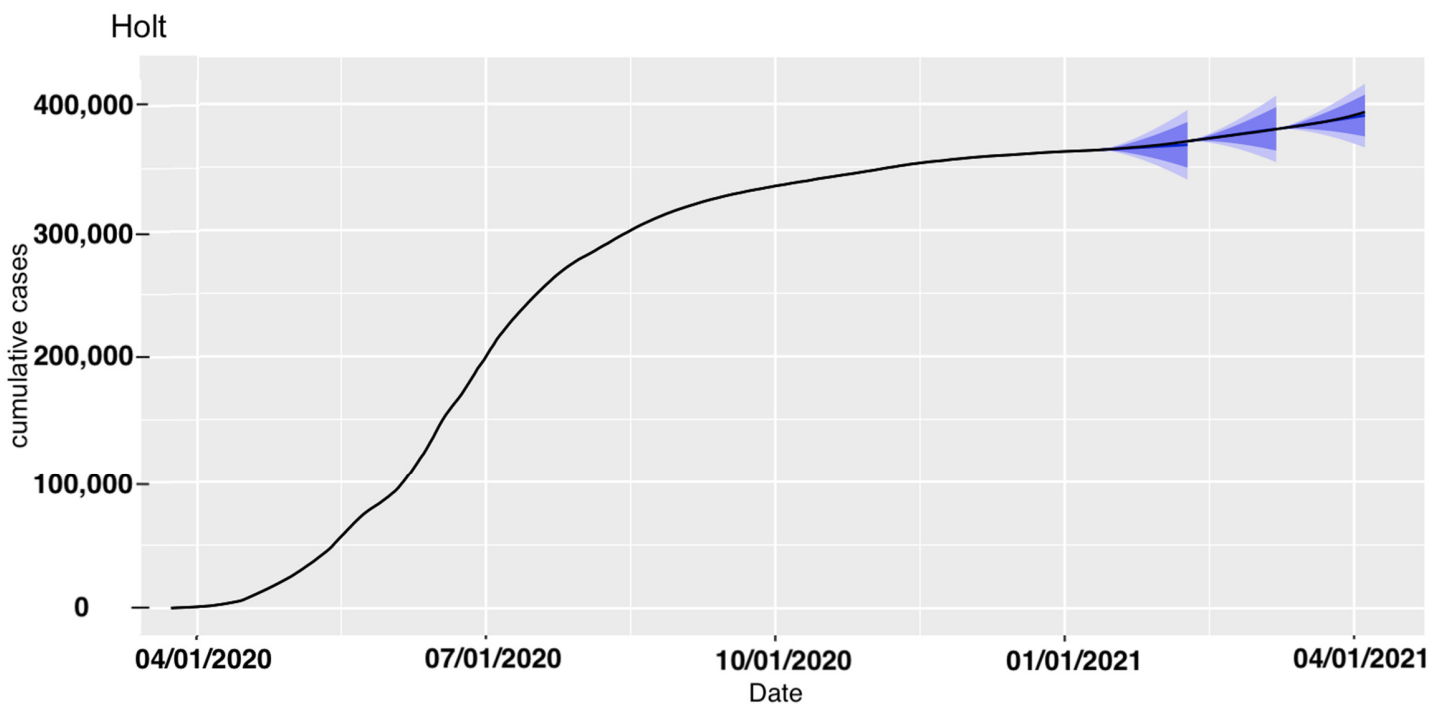

**(e)SES**

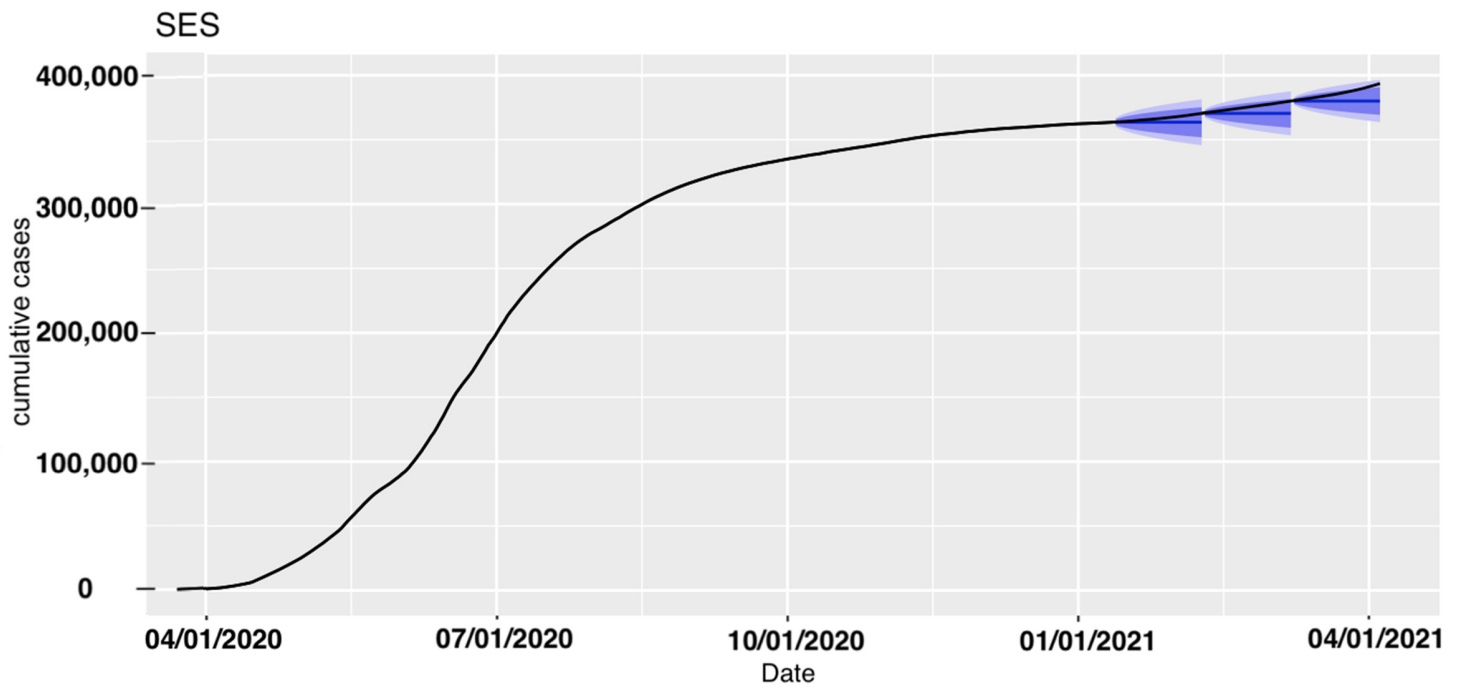

**(f)HoltWinters**

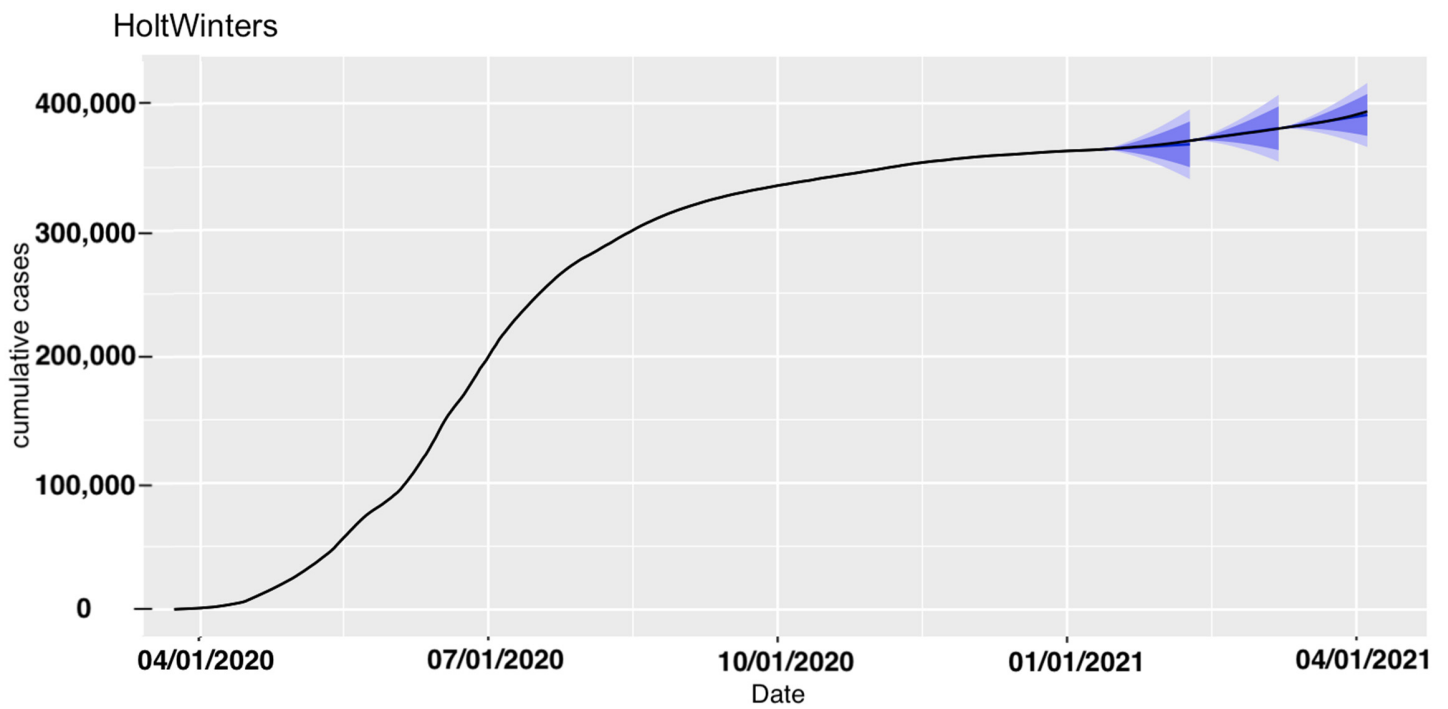

(g)cubic spline

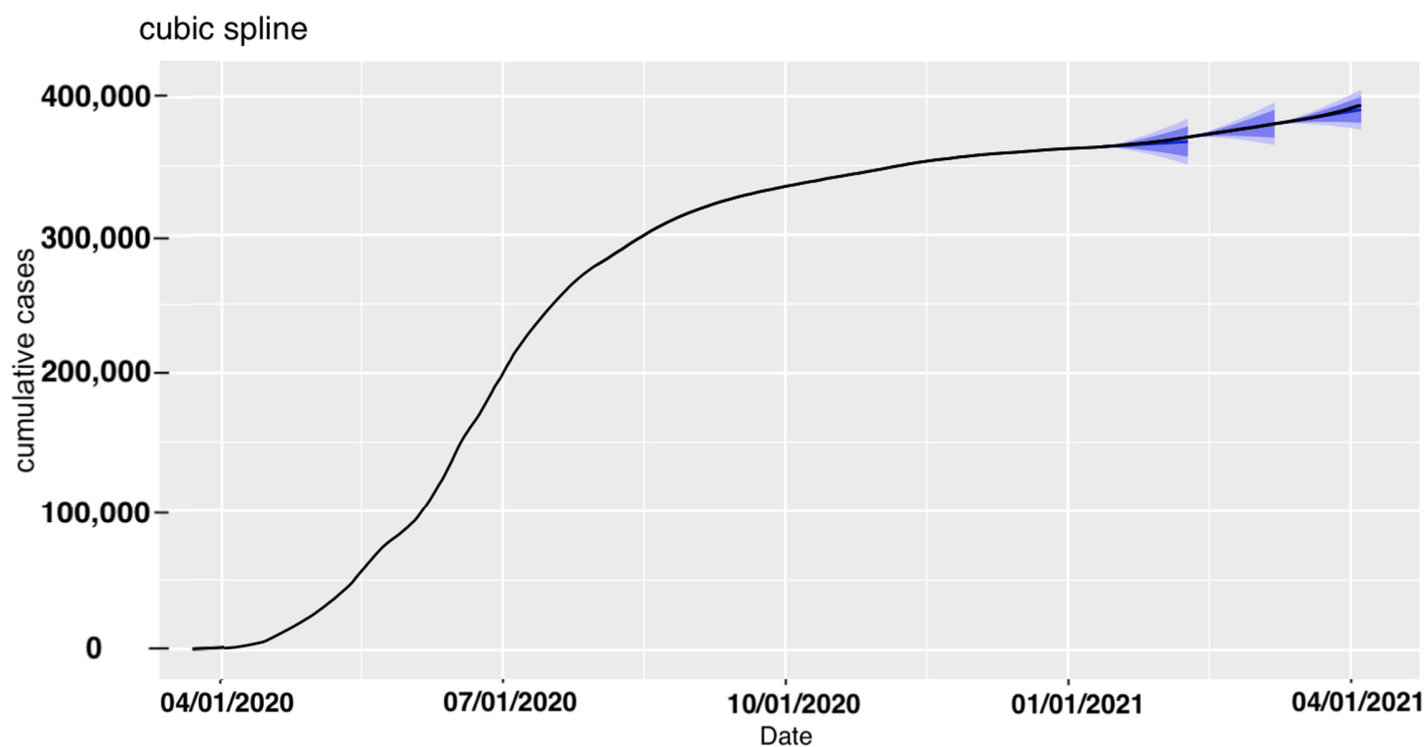

2- recovered cases in Saudi Arabia

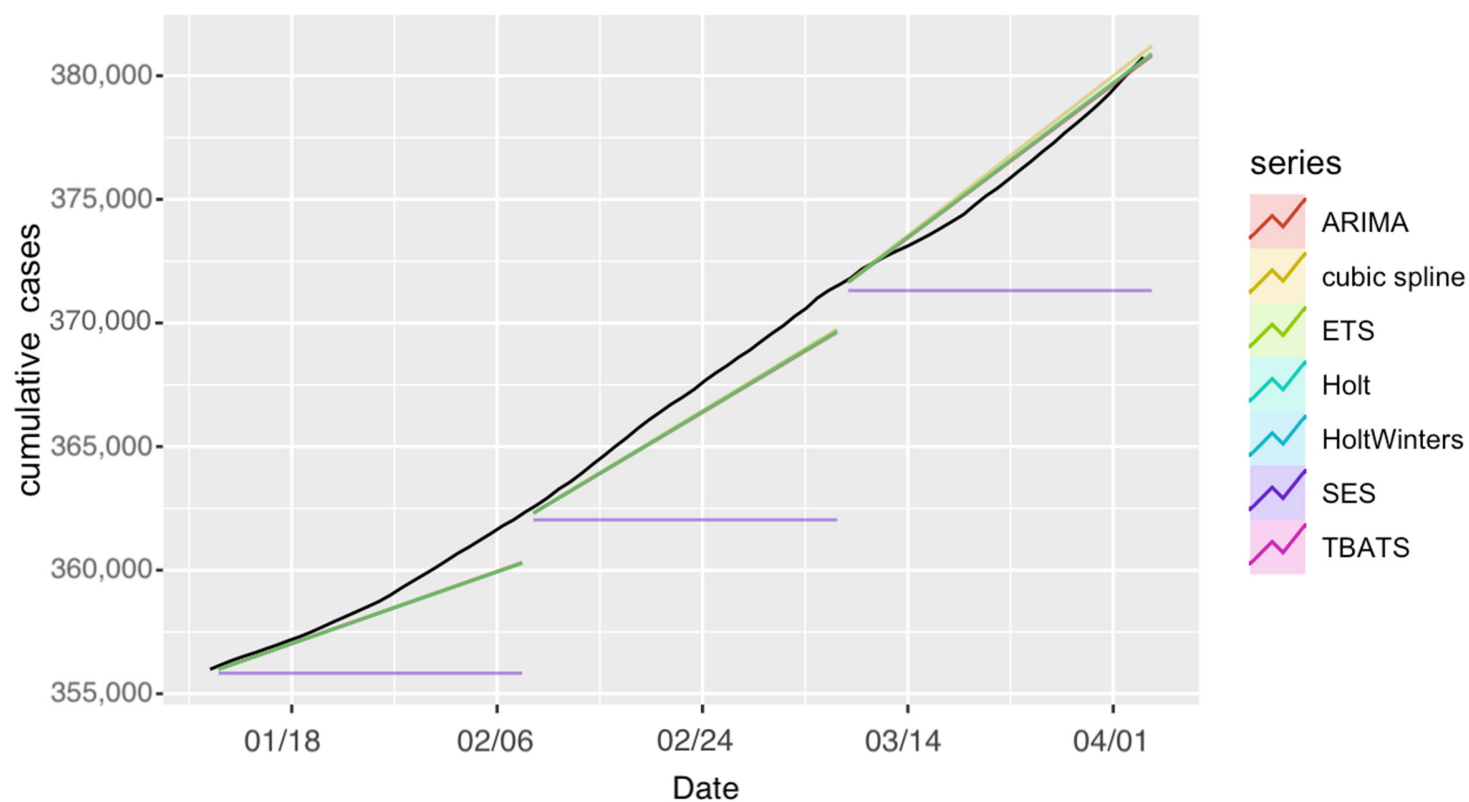

**(a)ARIMA**

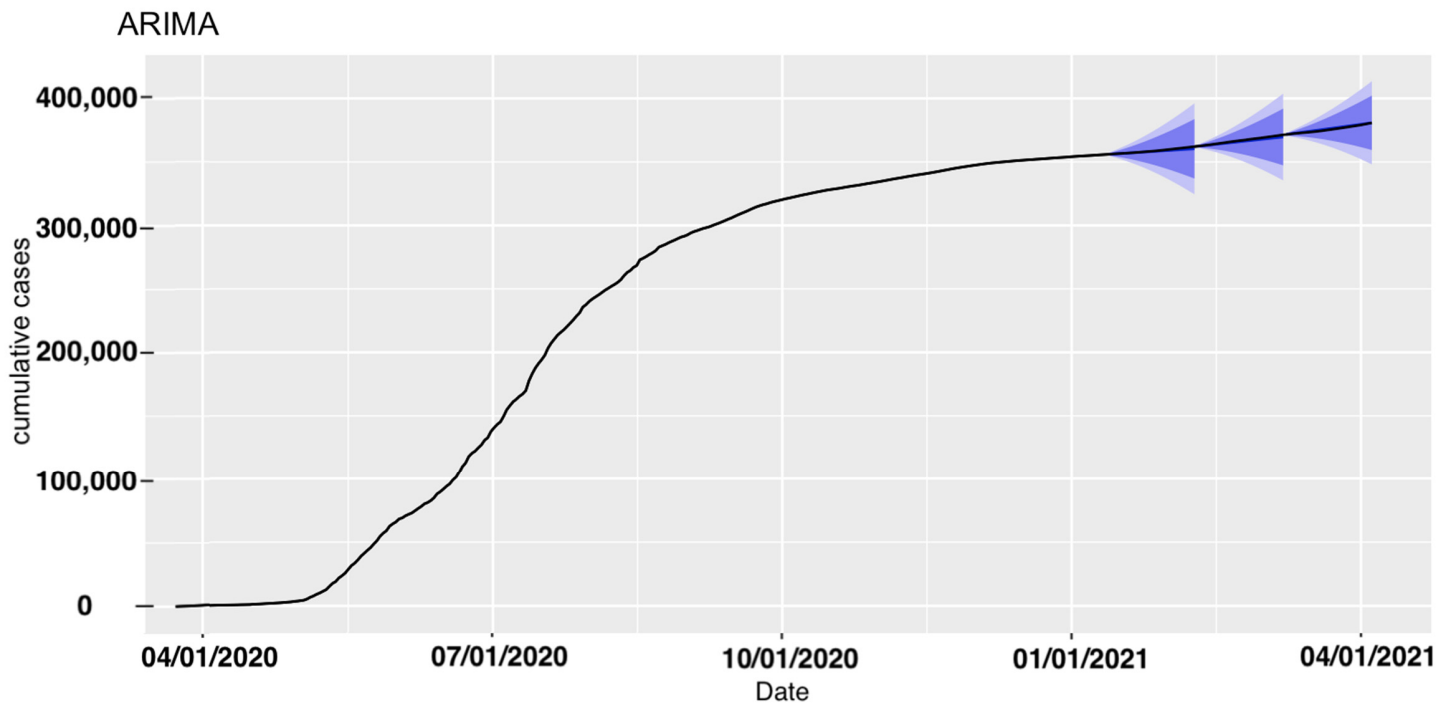

**(b)TBATS**

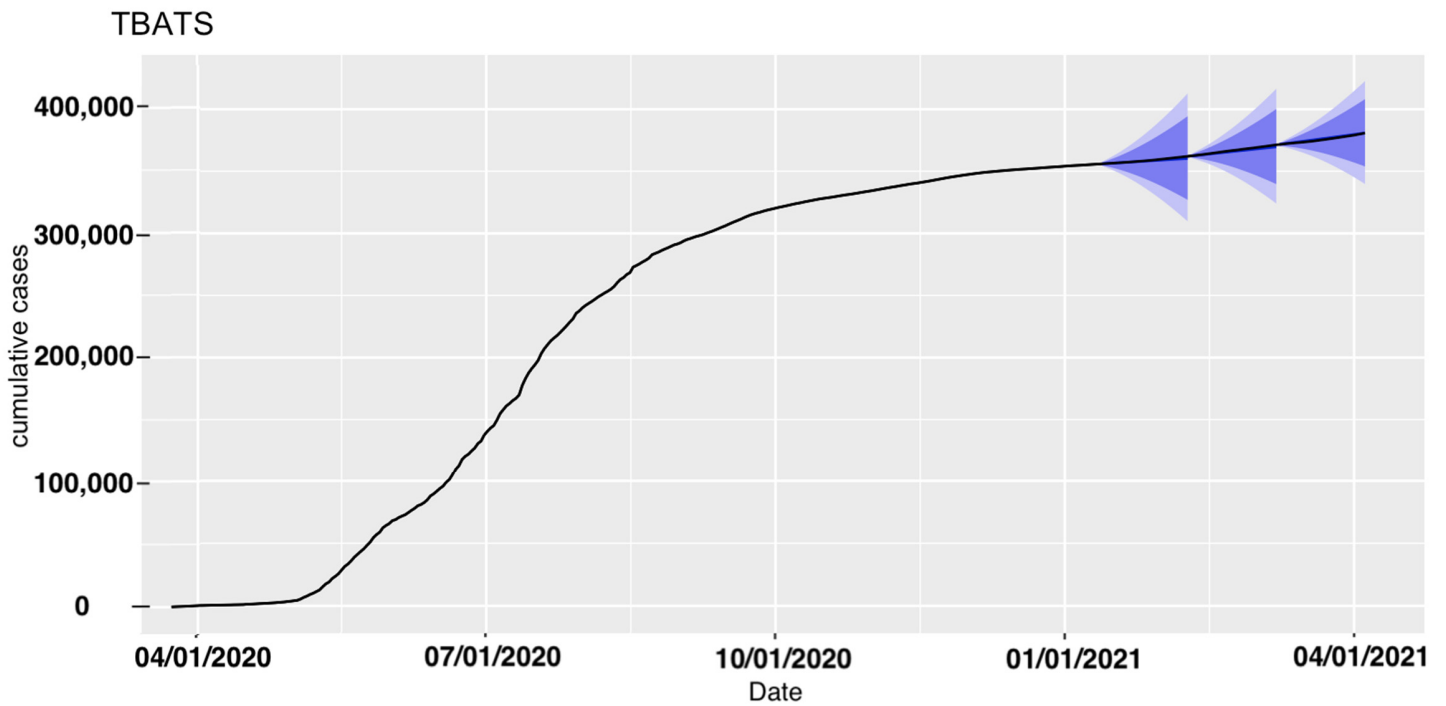

(c)ETS

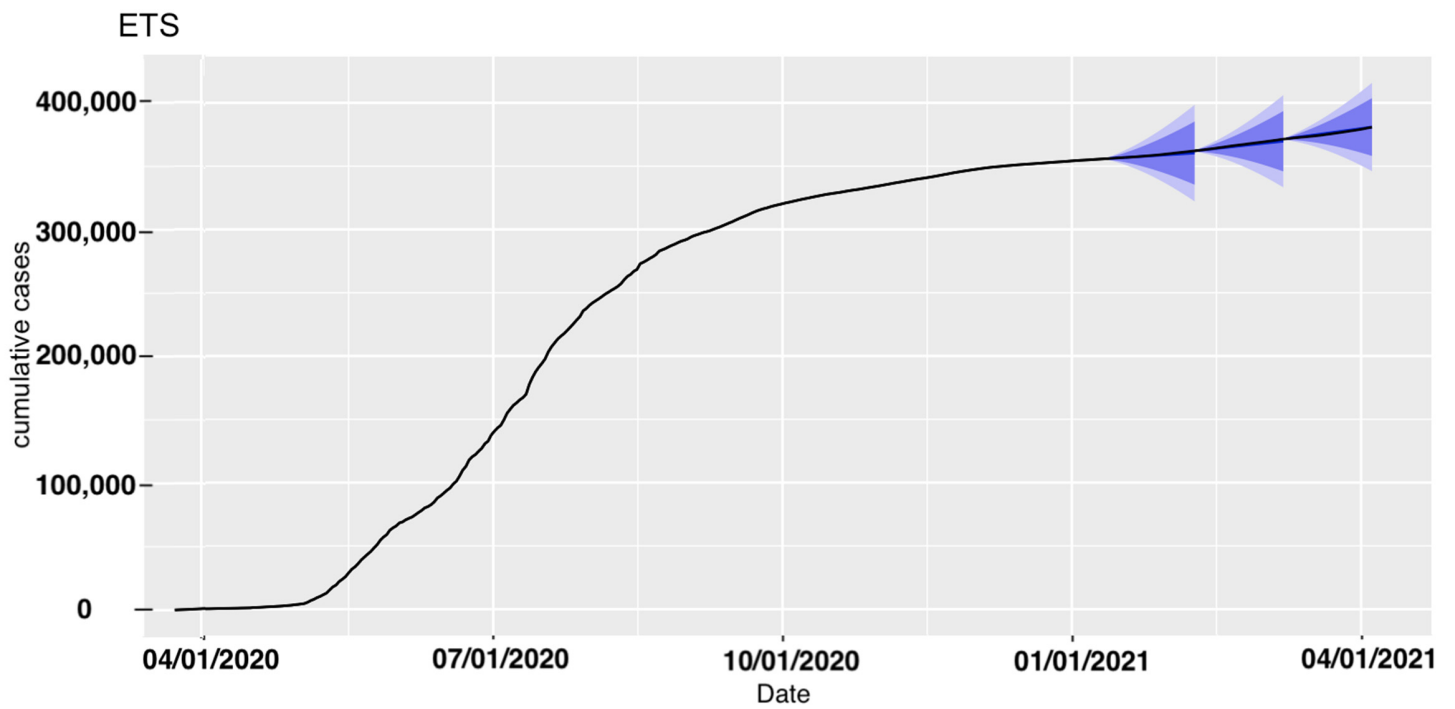

(d)Holt

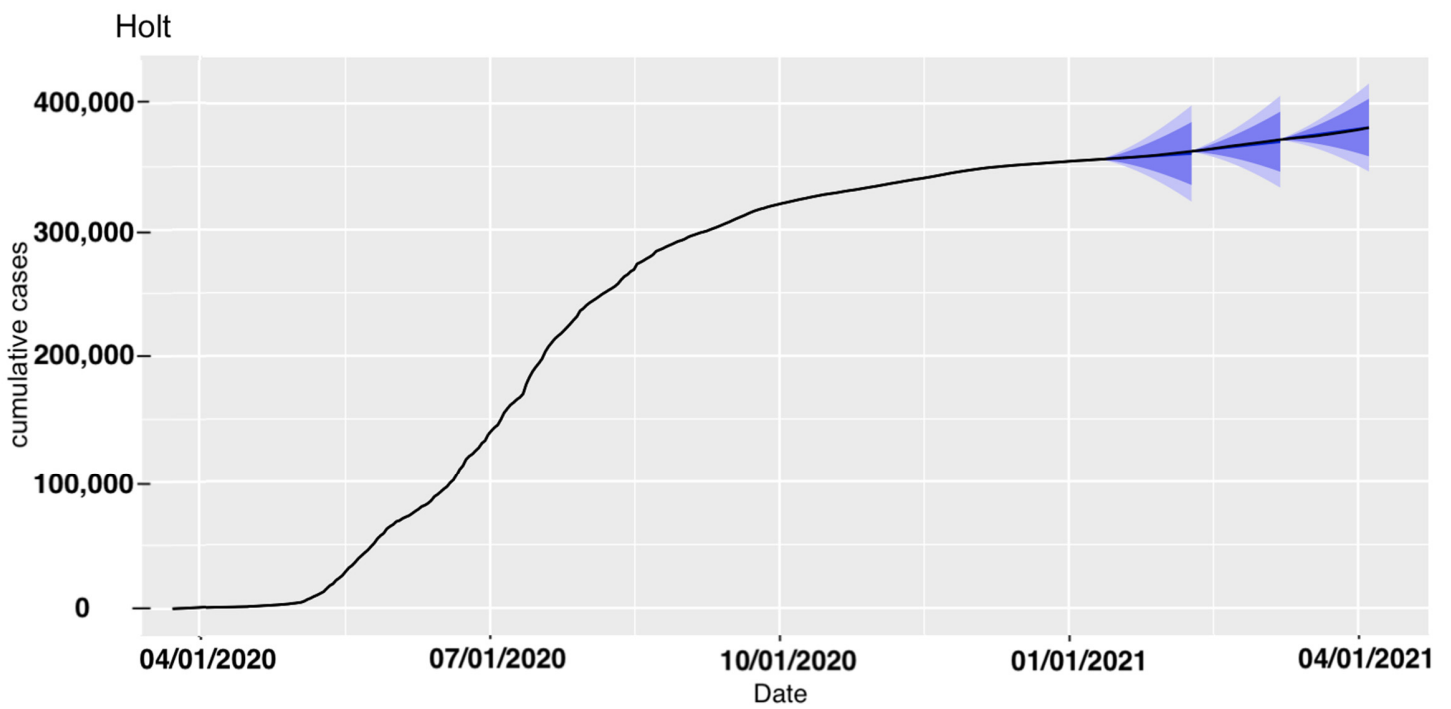

(e)SES

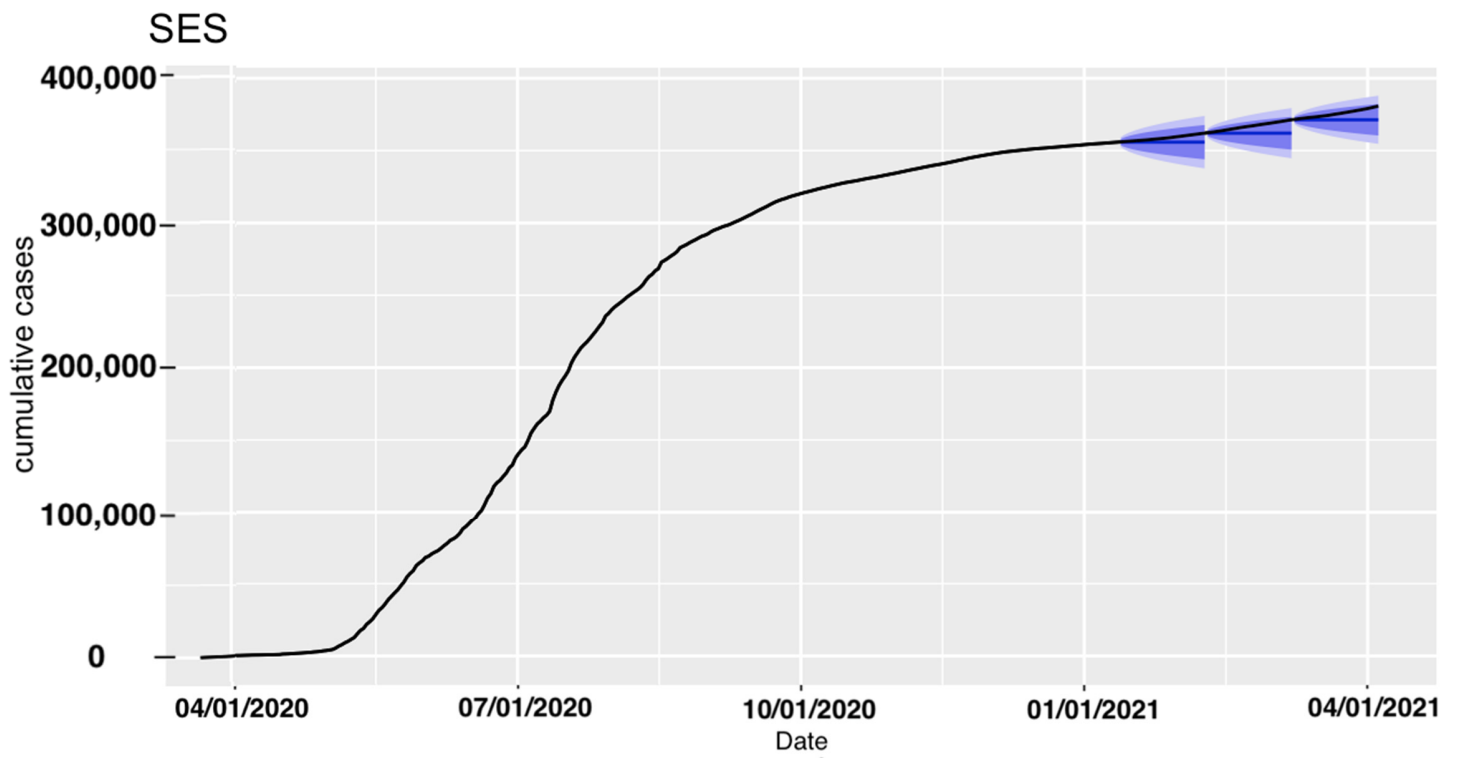

(f)HoltWinters

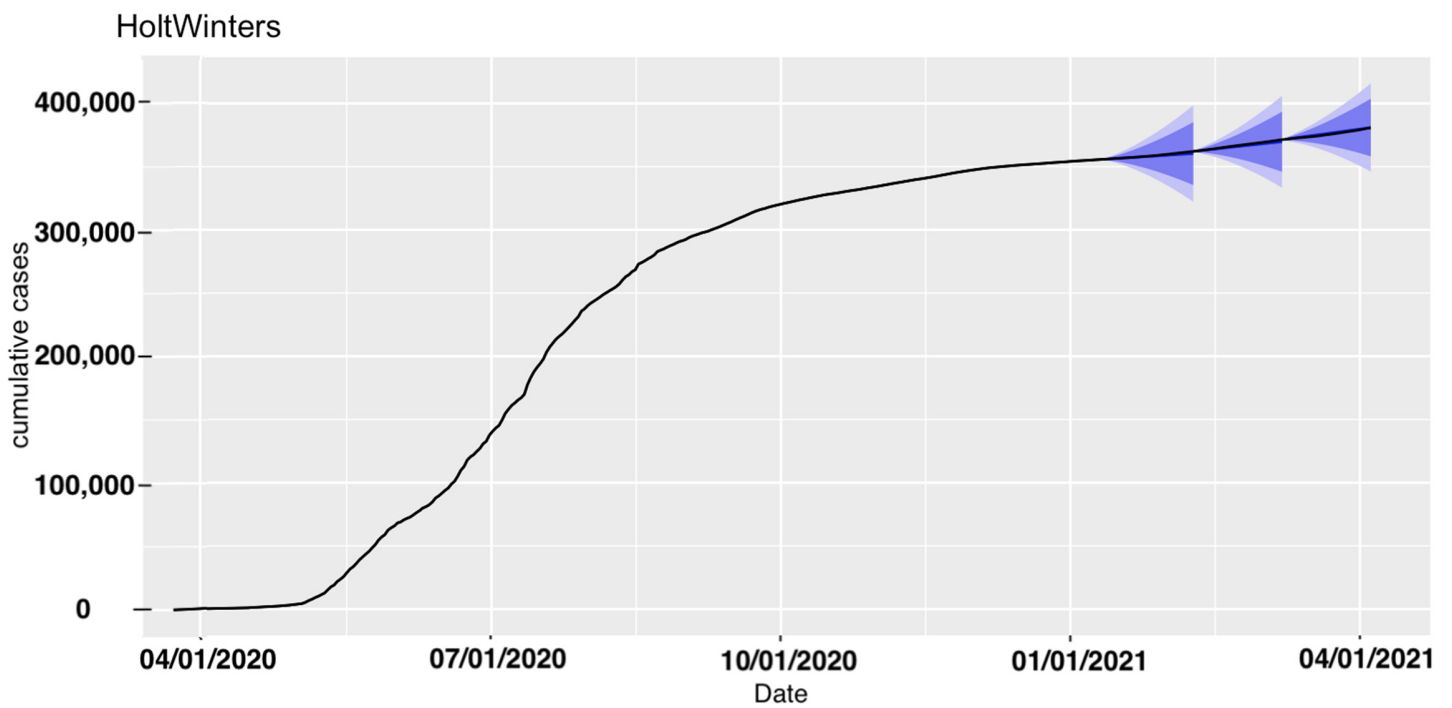



(g)cubic spline

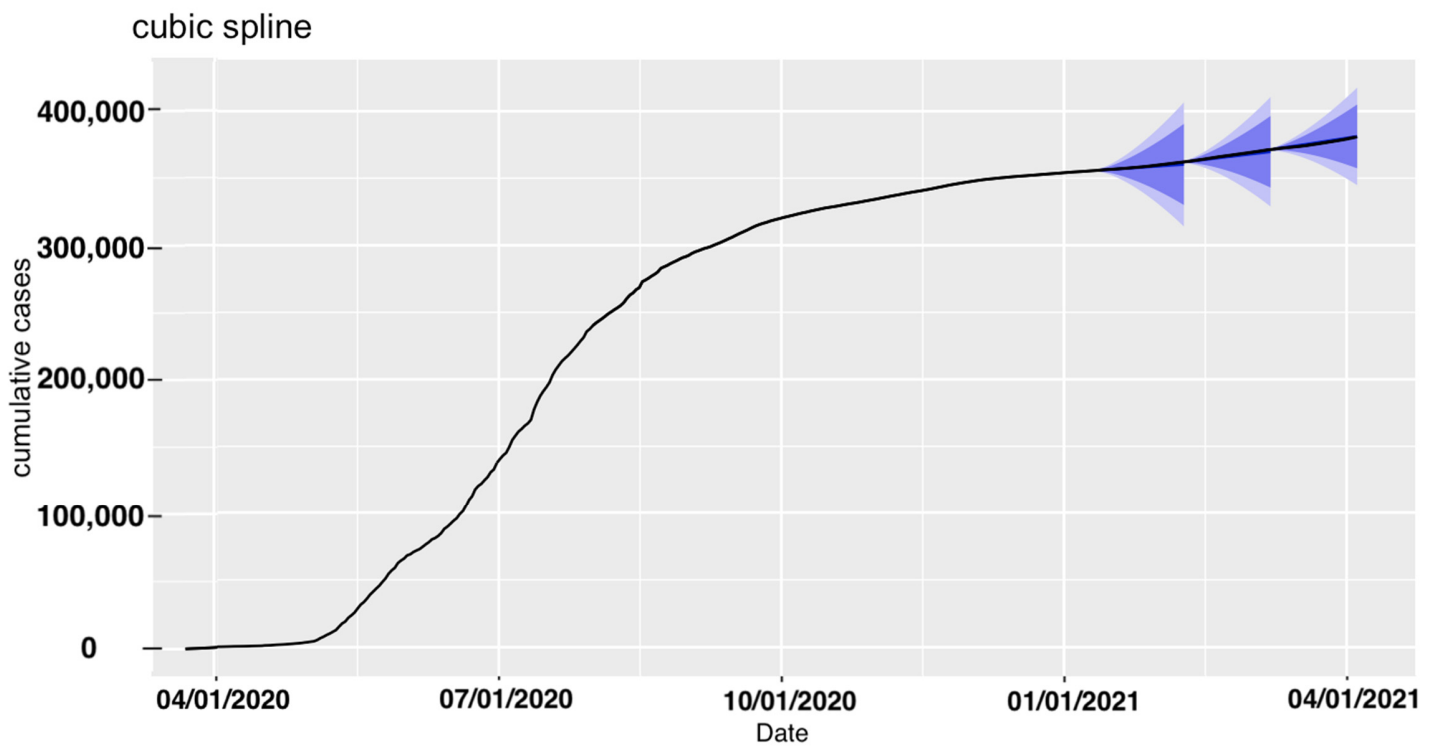

3- deaths in Saudi Arabia

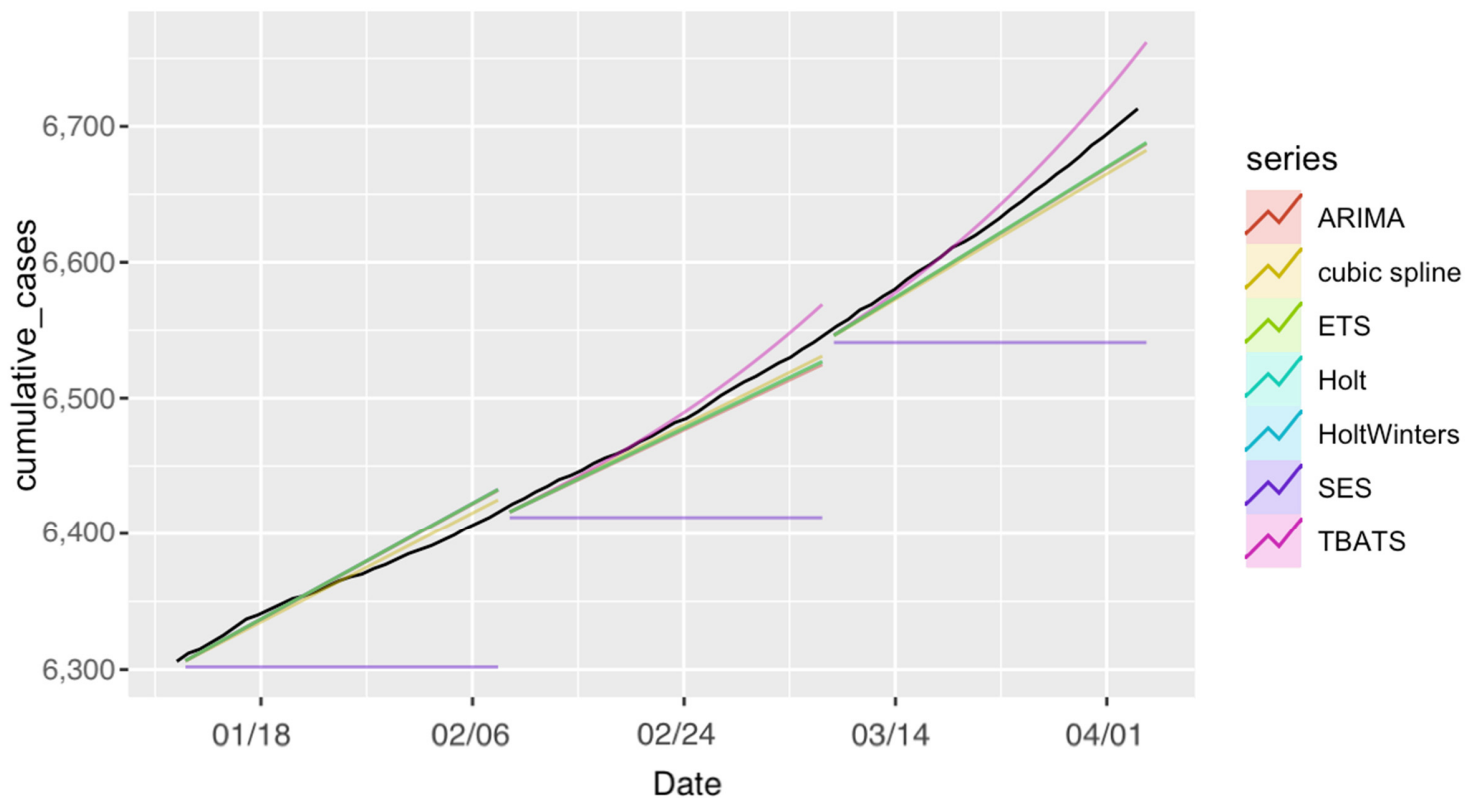

**(a)ARIMA**

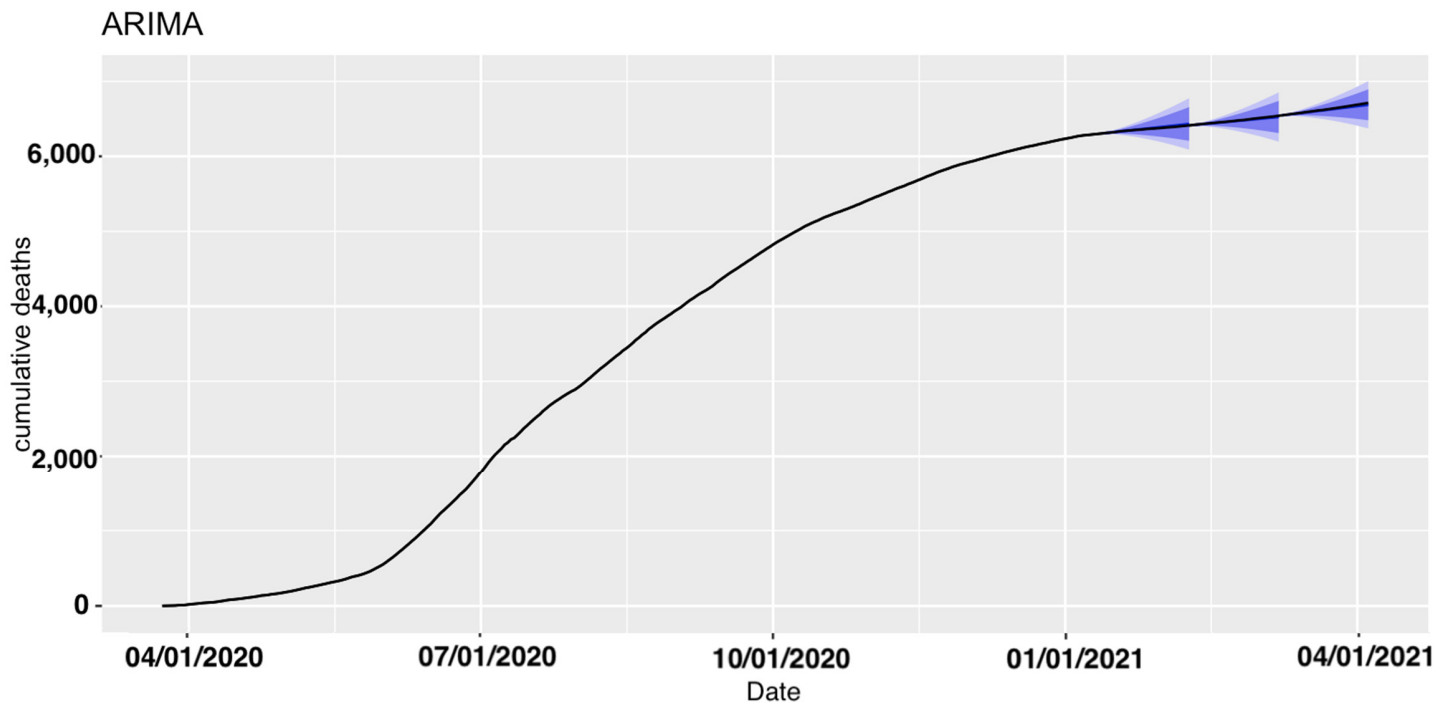

**(b)TBATS**

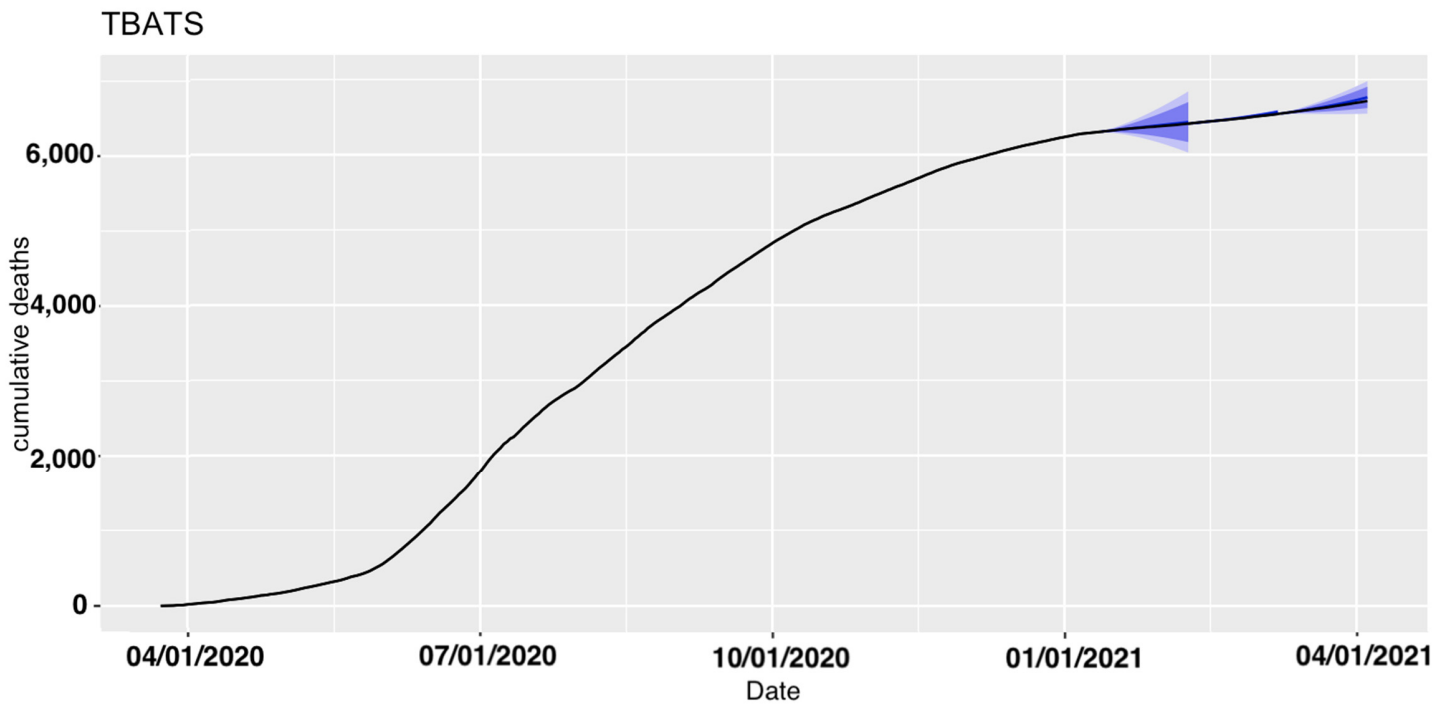

(c)ETS

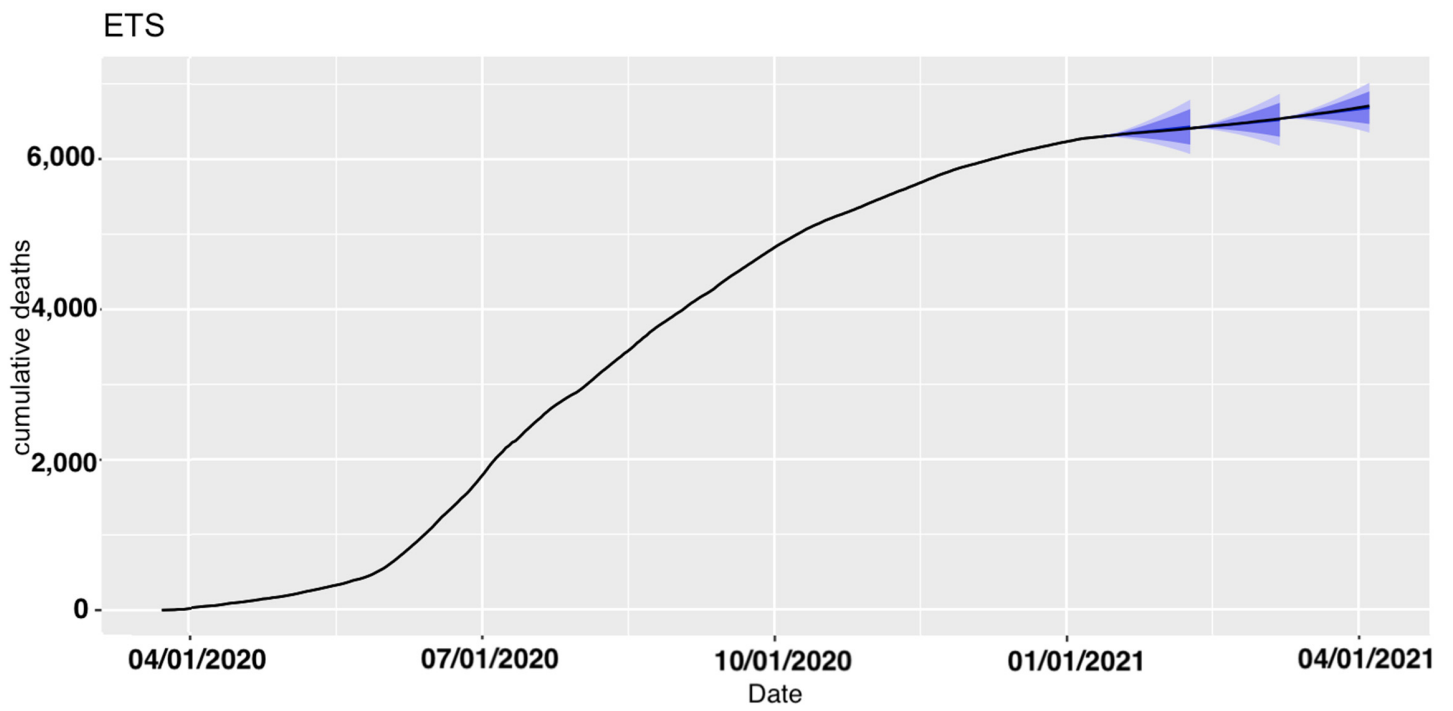

(d)Holt

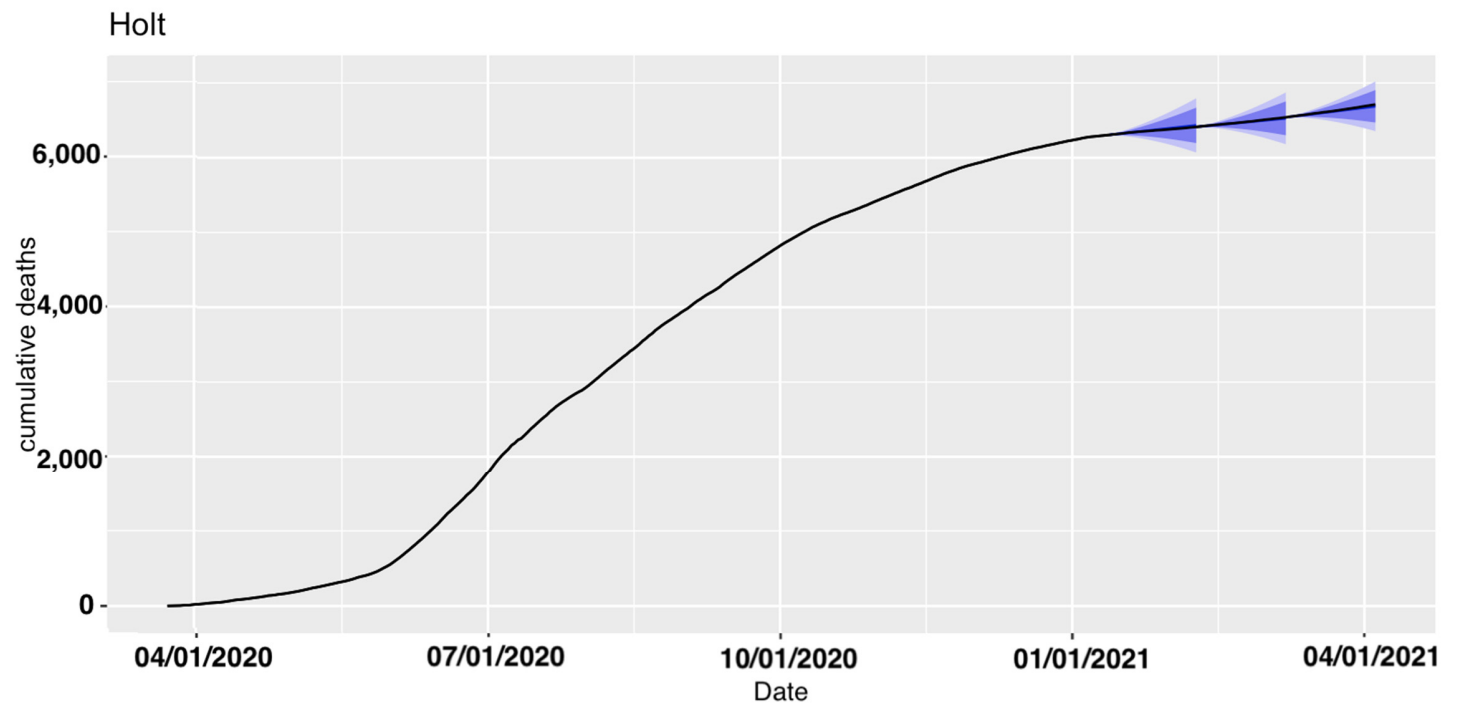

(e)SES

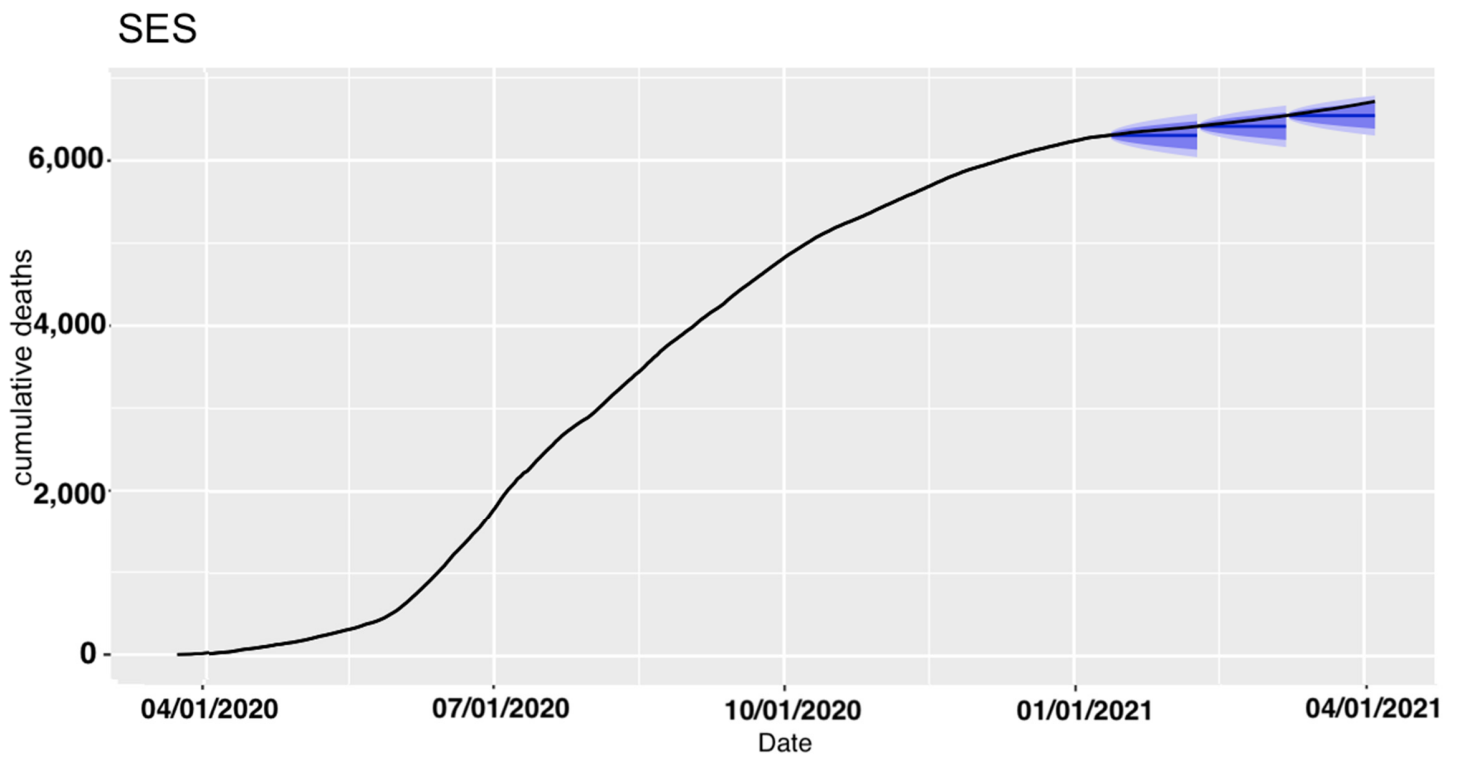

(f)HoltWinters

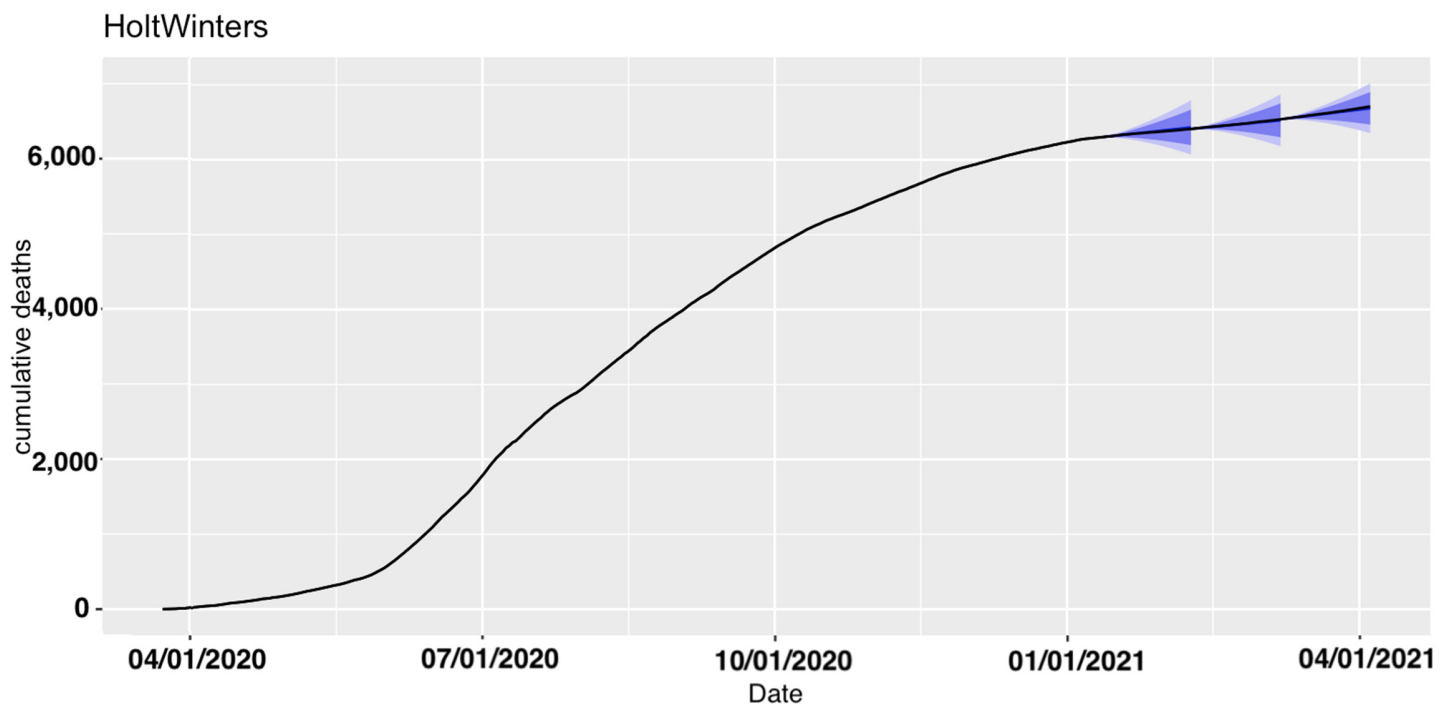

(g)cubic spline

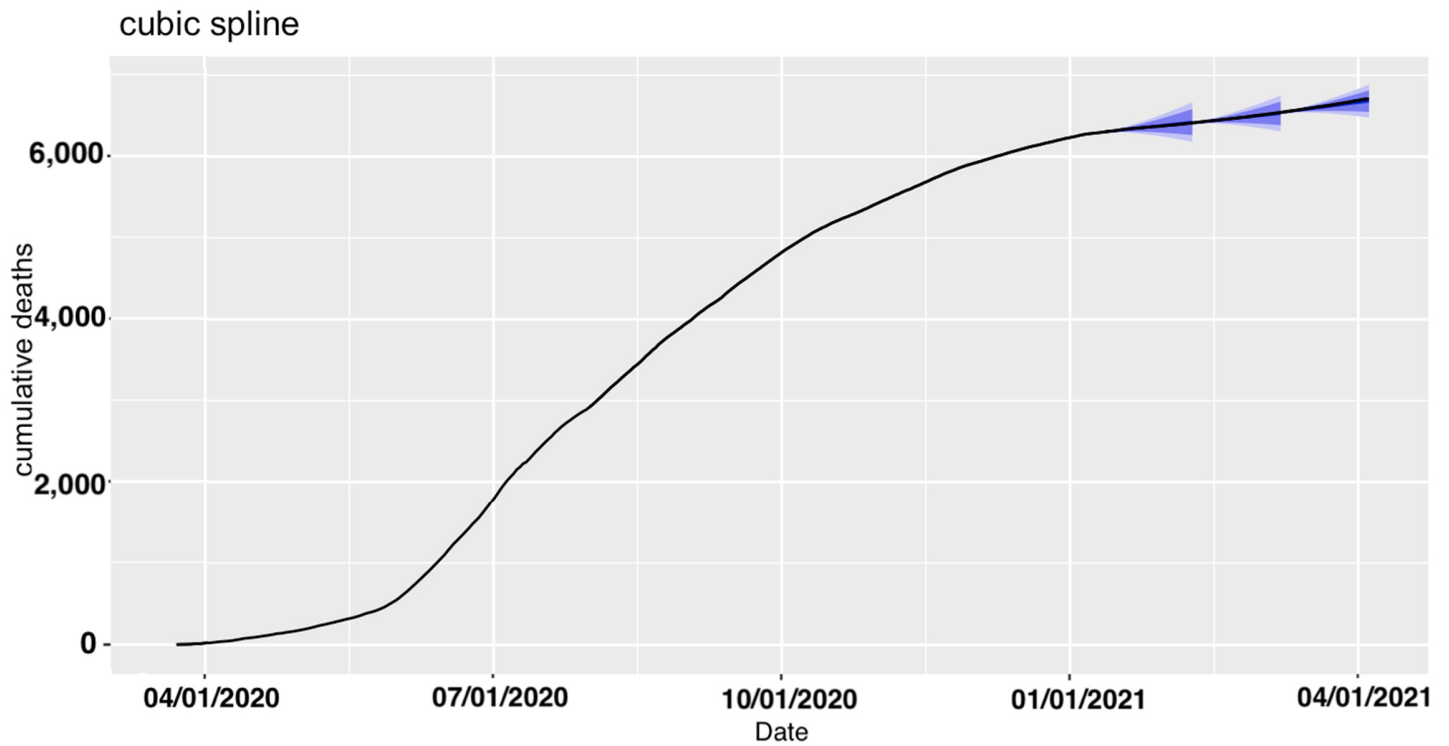

4- confirmed cases in Riyadh

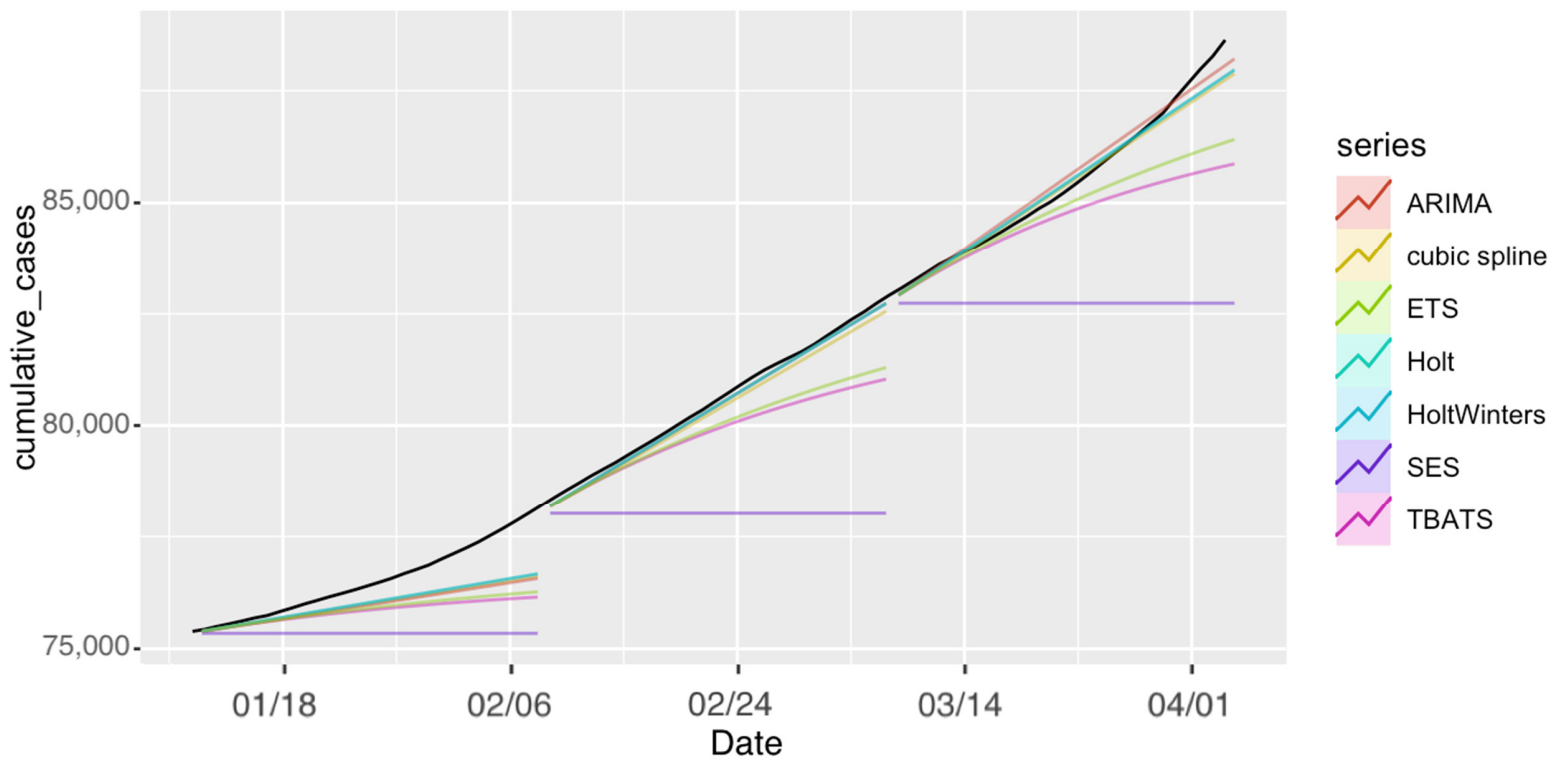

**(a)ARIMA**

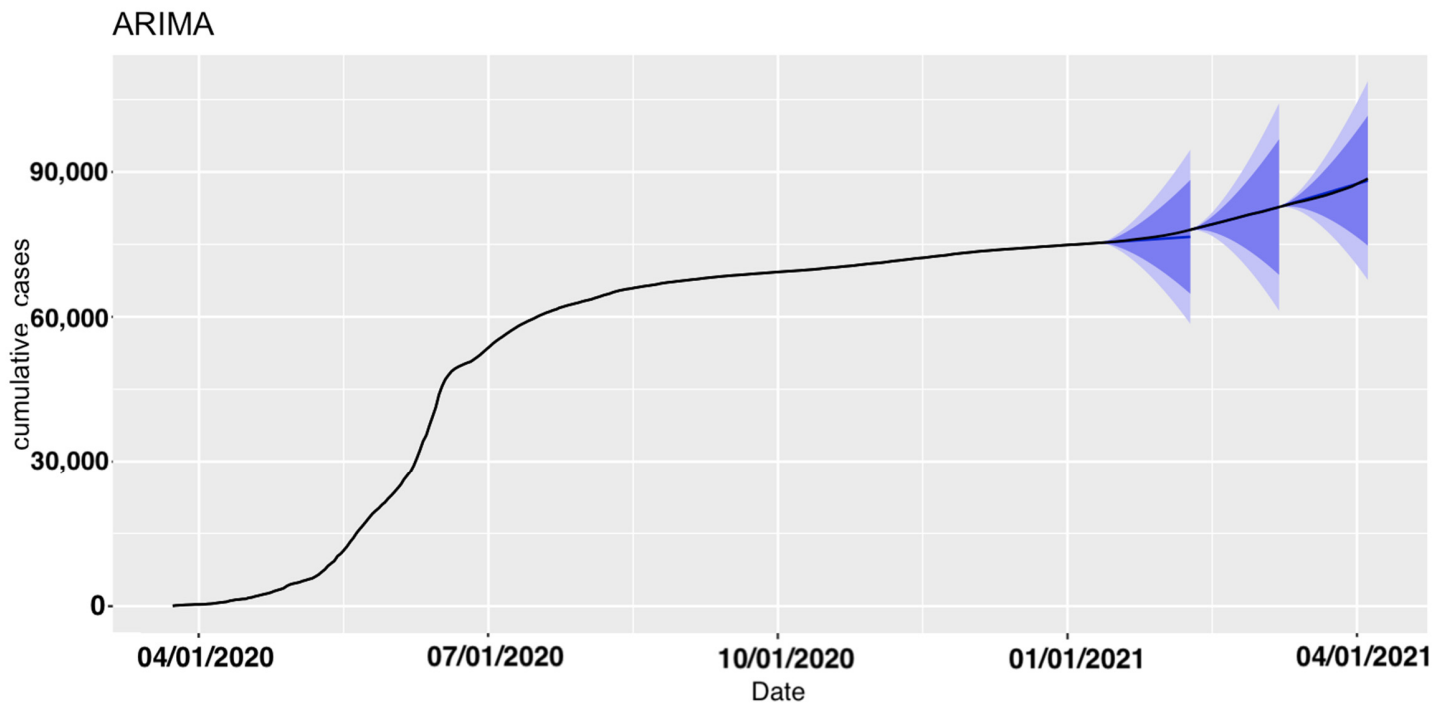

**(b)TBATS**

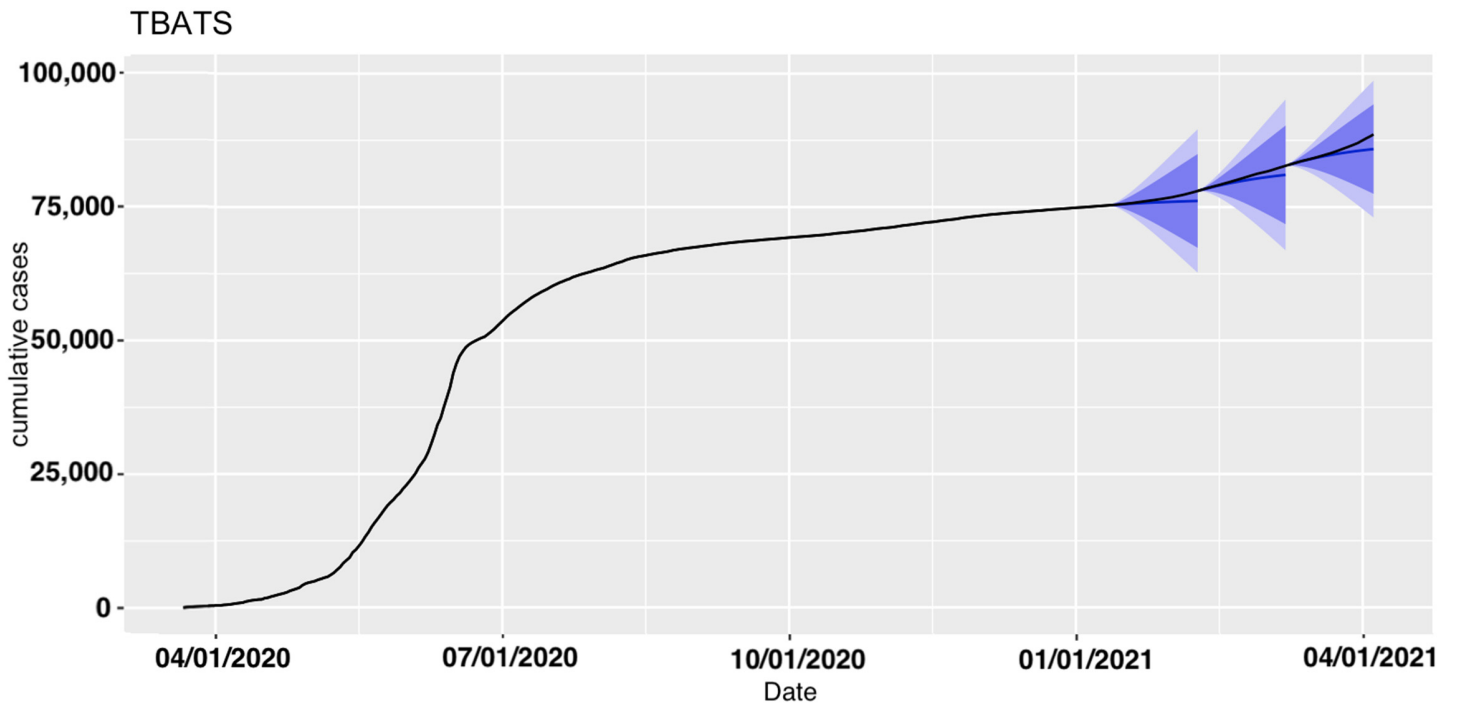

(c)ETS

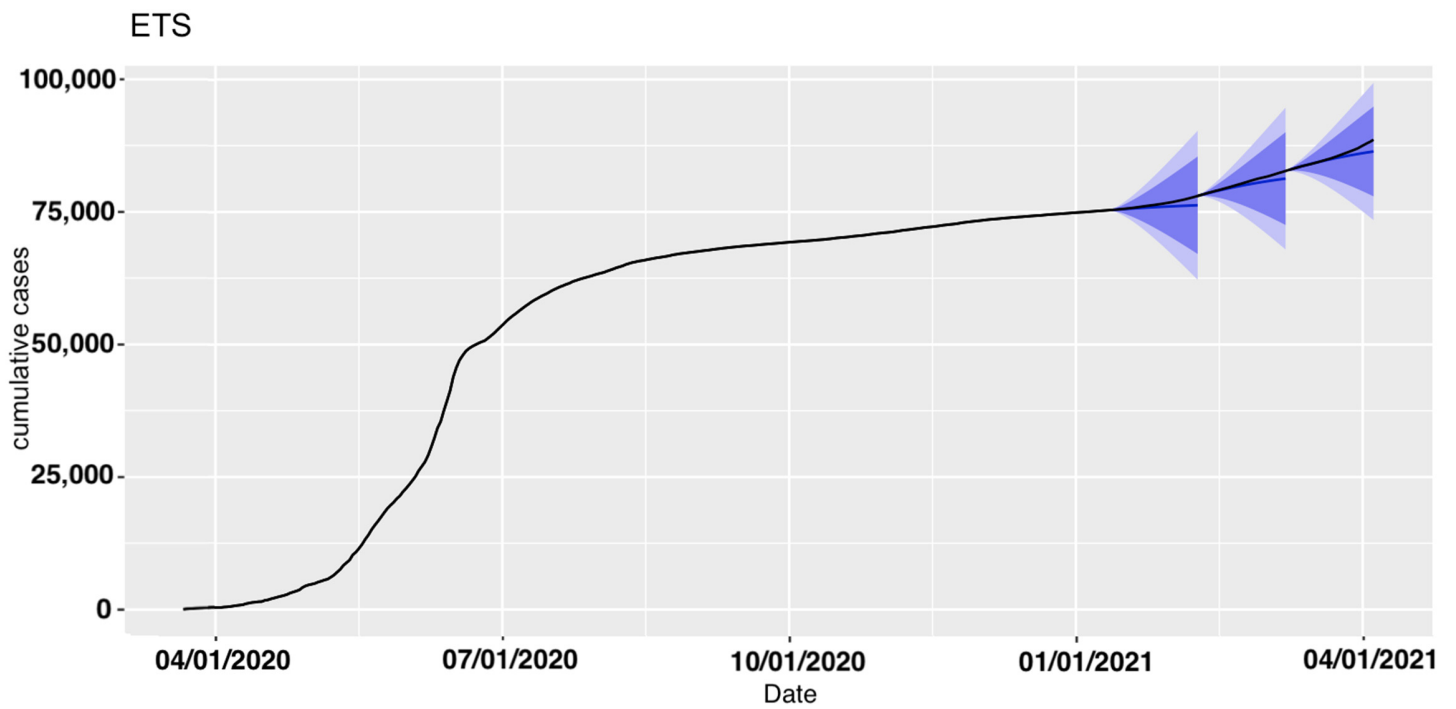

(d)Holt

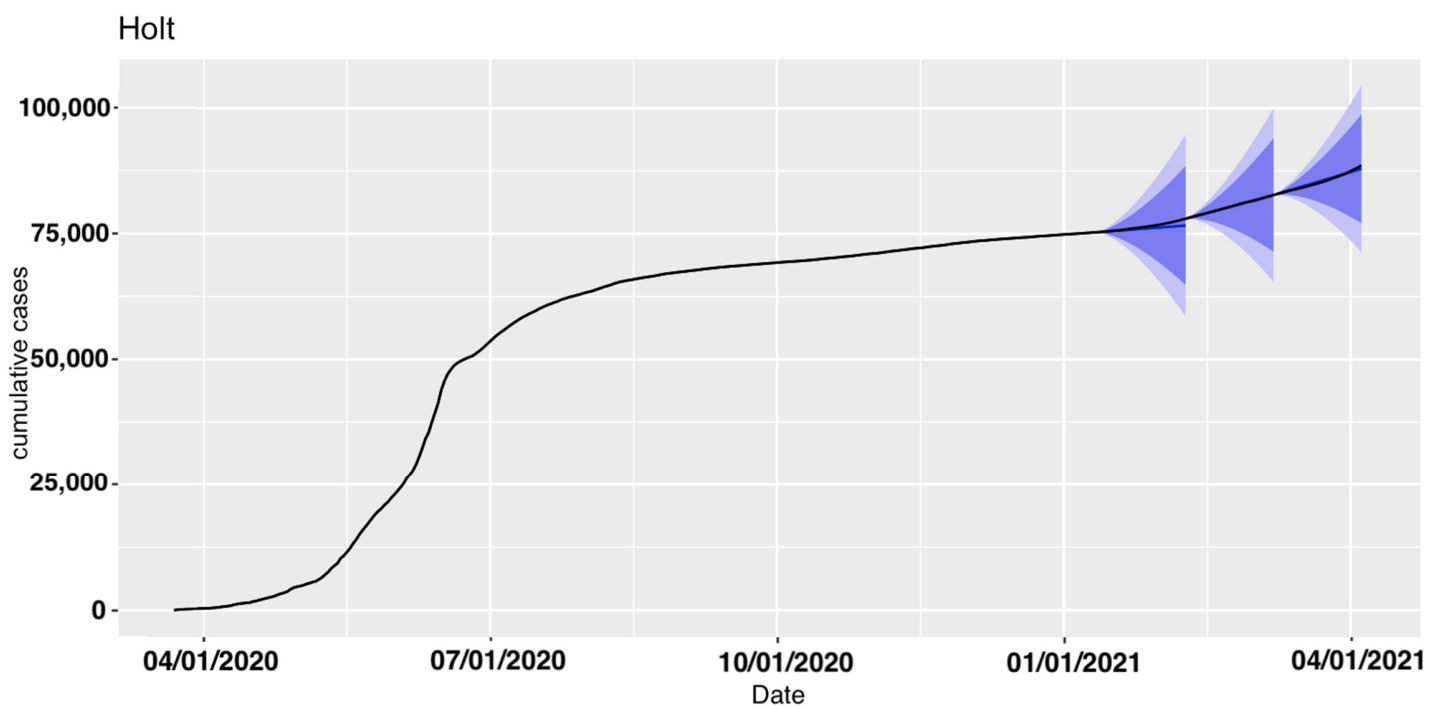

(e)SES

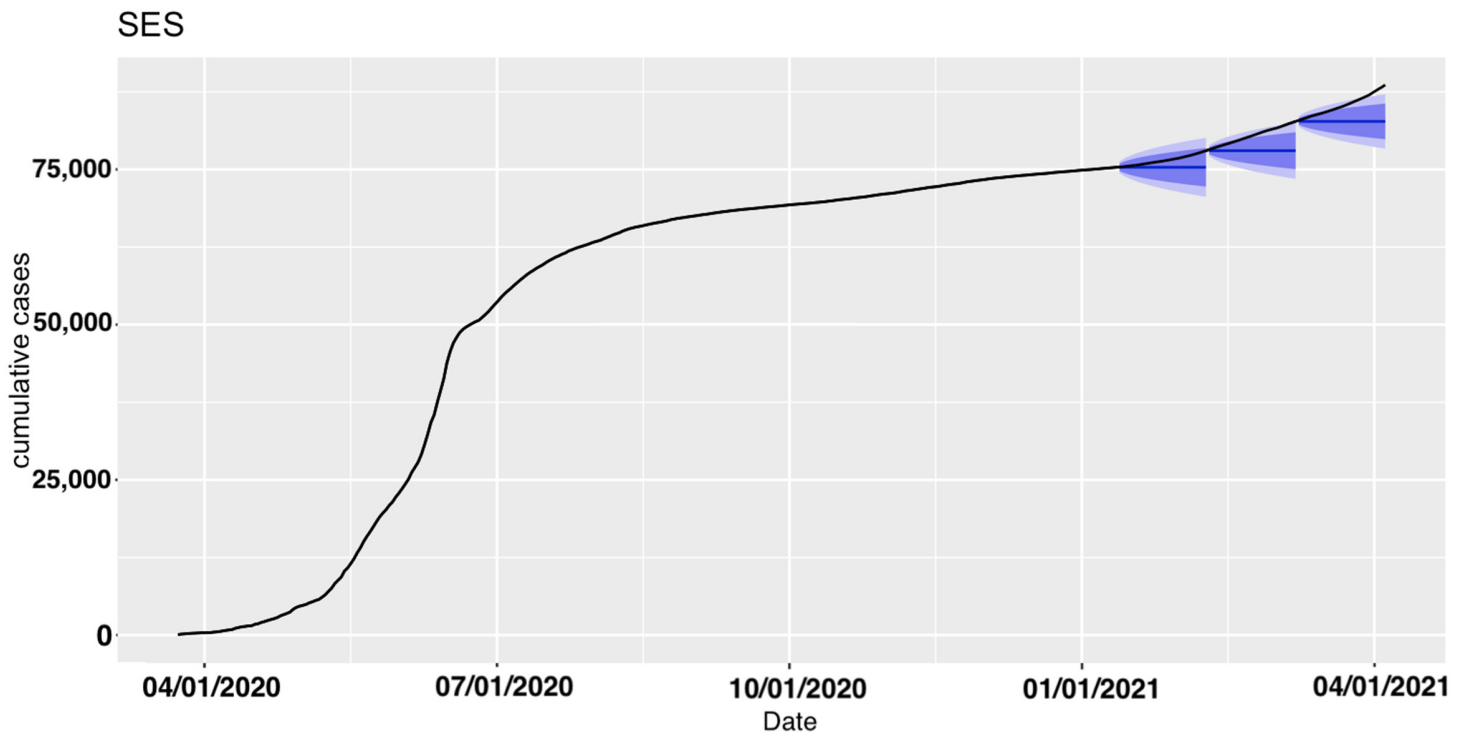

(f)HoltWinters

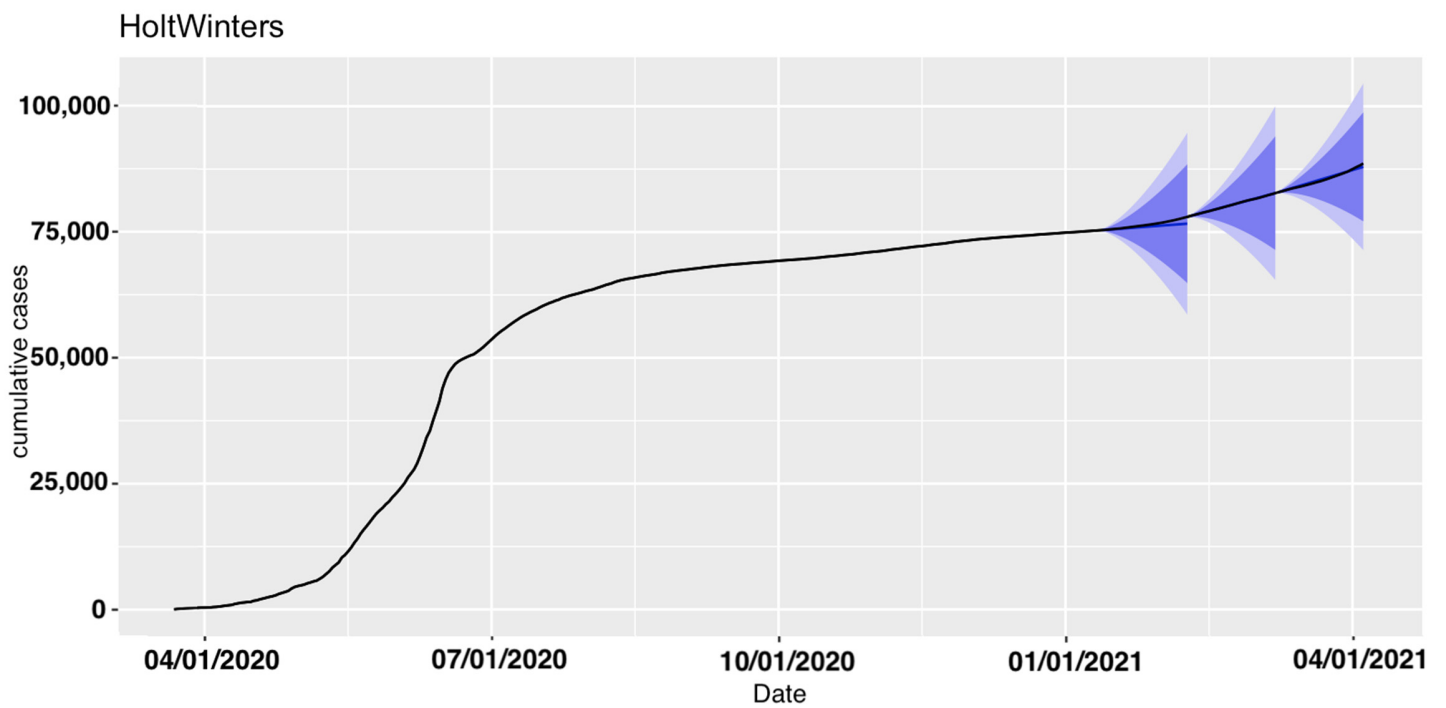



(g)cubic spline

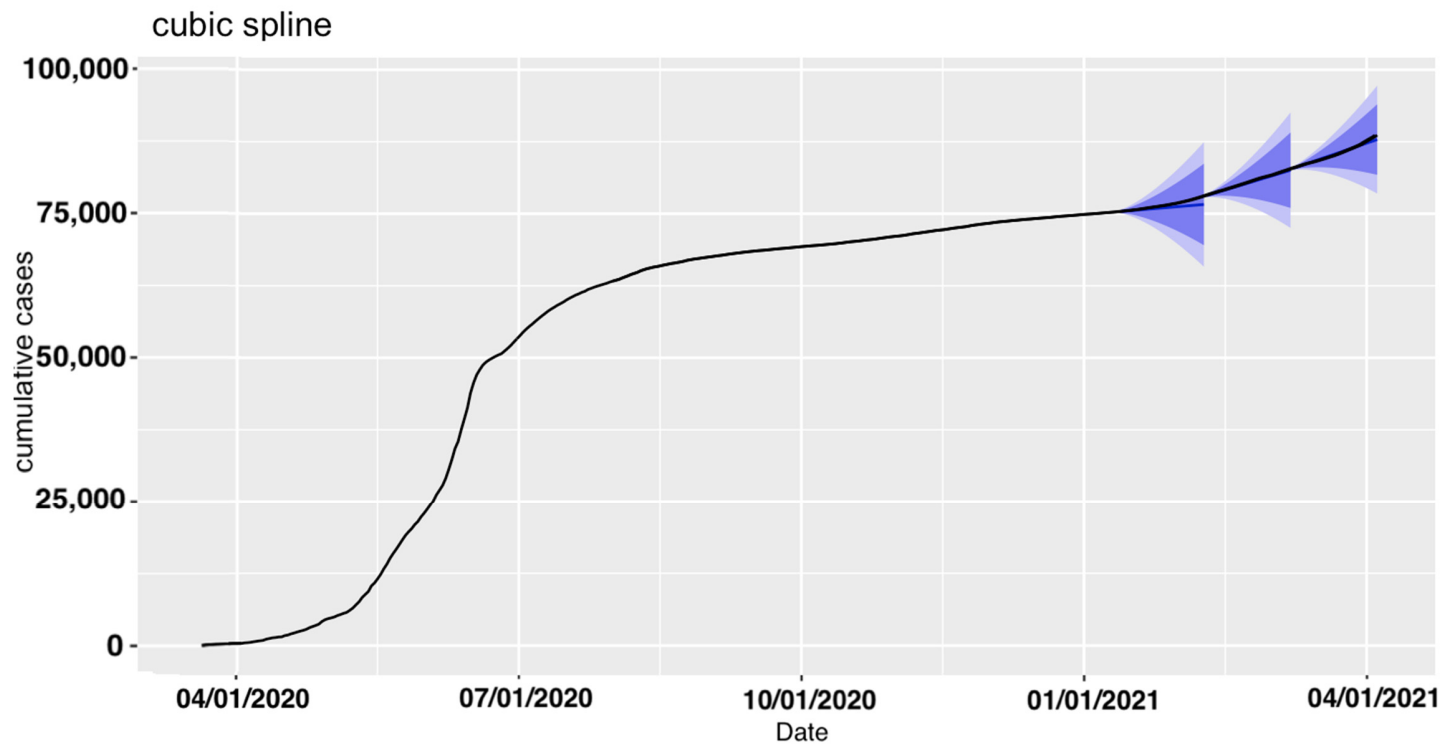

Supplement: s1 [file s1]
