# Supplementary material for: Empirical Evaluation of Alternative Time-Series Models for COVID-19 Forecasting in Saudi Arabia
Source: MDPI journal article supplement (doi:10.3390/ijerph18168660), 2021-08-16
Supplement: s1 [file s1]

# Supplementary File 1

**Table S1: KSA actual cases**

| DAY | Interval#1 |        |           | Interval#2 |        |           | Interval#3 |        |           |
|-----|------------|--------|-----------|------------|--------|-----------|------------|--------|-----------|
|     | Confirmed  | Deaths | Recovered | Confirmed  | Deaths | Recovered | Confirmed  | Deaths | Recovered |
| 1   | 363709     | 6306   | 355989    | 370794     | 6417   | 362344    | 380396     | 6547   | 371559    |
| 2   | 363878     | 6312   | 356177    | 371158     | 6422   | 362618    | 380786     | 6553   | 371826    |
| 3   | 364051     | 6315   | 356358    | 371511     | 6426   | 362923    | 381146     | 6558   | 372193    |
| 4   | 364191     | 6320   | 356517    | 371848     | 6431   | 363279    | 381497     | 6565   | 372432    |
| 5   | 364367     | 6325   | 356663    | 372170     | 6435   | 363561    | 381845     | 6569   | 372679    |
| 6   | 364537     | 6331   | 356824    | 372484     | 6440   | 363902    | 382190     | 6575   | 372902    |
| 7   | 364763     | 6337   | 356980    | 372806     | 6443   | 364273    | 382544     | 6580   | 373106    |
| 8   | 365001     | 6340   | 357153    | 373140     | 6447   | 364622    | 382937     | 6587   | 373337    |
| 9   | 365213     | 6344   | 357313    | 373467     | 6452   | 364993    | 383318     | 6593   | 373577    |
| 10  | 365426     | 6348   | 357501    | 373804     | 6456   | 365339    | 383709     | 6598   | 373840    |
| 11  | 365623     | 6352   | 357704    | 374129     | 6459   | 365721    | 384091     | 6604   | 374111    |
| 12  | 365809     | 6354   | 357915    | 374444     | 6463   | 366070    | 384458     | 6611   | 374388    |
| 13  | 366022     | 6357   | 358113    | 374771     | 6468   | 366388    | 384862     | 6615   | 374775    |
| 14  | 366245     | 6361   | 358316    | 375106     | 6472   | 366711    | 385272     | 6620   | 375141    |
| 15  | 366461     | 6365   | 358521    | 375459     | 6477   | 366991    | 385738     | 6626   | 375447    |
| 16  | 366714     | 6368   | 358729    | 375815     | 6482   | 367299    | 386220     | 6632   | 375807    |
| 17  | 366981     | 6370   | 358982    | 376161     | 6485   | 367667    | 386730     | 6639   | 376179    |
| 18  | 367251     | 6374   | 359275    | 376499     | 6490   | 367987    | 387232     | 6645   | 376534    |
| 19  | 367512     | 6377   | 359549    | 376821     | 6496   | 368281    | 387763     | 6652   | 376923    |
| 20  | 367767     | 6381   | 359815    | 377138     | 6502   | 368616    | 388304     | 6658   | 377280    |
| 21  | 368077     | 6385   | 360086    | 377440     | 6507   | 368902    | 388860     | 6665   | 377690    |
| 22  | 368383     | 6388   | 360376    | 377771     | 6512   | 369253    | 389445     | 6671   | 378059    |
| 23  | 368686     | 6391   | 360673    | 378146     | 6516   | 369589    | 390035     | 6678   | 378445    |
| 24  | 369013     | 6395   | 360930    | 378530     | 6521   | 369898    | 390763     | 6686   | 378849    |
| 25  | 369399     | 6399   | 361213    | 378912     | 6526   | 370276    | 391447     | 6692   | 379288    |
| 26  | 369716     | 6404   | 361491    | 379269     | 6530   | 370590    | 392120     | 6699   | 379792    |
| 27  | 370072     | 6408   | 361789    | 379620     | 6536   | 371008    | 392815     | 6706   | 380281    |
| 28  | 370425     | 6412   | 362038    | 380010     | 6541   | 371314    | 393607     | 6713   | 380748    |

**Table S2: KSA forecasted confirmed cases**

|    | Interval#1 |          |          |                |          |          |               |
|----|------------|----------|----------|----------------|----------|----------|---------------|
|    | ARIMA_1    | TBATS_1  | ETS_1    | cubic spline_1 | Holt_1   | SES_1    | HoltWinters_1 |
| 1  | 363686.1   | 363679.7 | 363680.1 | 363657.5       | 363680.1 | 363532.5 | 363680.0506   |
| 2  | 363836.3   | 363825.3 | 363826.1 | 363792.6       | 363826.1 | 363532.5 | 363826.1011   |
| 3  | 363982.9   | 363970.9 | 363972.2 | 363927.7       | 363972.2 | 363532.5 | 363972.1517   |
| 4  | 364131.2   | 364116.5 | 364118.2 | 364062.7       | 364118.2 | 363532.5 | 364118.2022   |
| 5  | 364281.8   | 364262.1 | 364264.3 | 364197.8       | 364264.3 | 363532.5 | 364264.2528   |
| 6  | 364431     | 364407.7 | 364410.3 | 364332.9       | 364410.3 | 363532.5 | 364410.3033   |
| 7  | 364578.8   | 364553.3 | 364556.4 | 364468         | 364556.4 | 363532.5 | 364556.3539   |
| 8  | 364727.6   | 364698.9 | 364702.4 | 364603.1       | 364702.4 | 363532.5 | 364702.4044   |
| 9  | 364877.4   | 364844.5 | 364848.5 | 364738.2       | 364848.5 | 363532.5 | 364848.455    |
| 10 | 365026.3   | 364990.1 | 364994.5 | 364873.3       | 364994.5 | 363532.5 | 364994.5055   |
| 11 | 365174.6   | 365135.7 | 365140.6 | 365008.3       | 365140.6 | 363532.5 | 365140.5561   |
| 12 | 365323.6   | 365281.3 | 365286.6 | 365143.4       | 365286.6 | 363532.5 | 365286.6066   |
| 13 | 365473     | 365426.9 | 365432.7 | 365278.5       | 365432.7 | 363532.5 | 365432.6572   |
| 14 | 365621.8   | 365572.4 | 365578.7 | 365413.6       | 365578.7 | 363532.5 | 365578.7077   |
| 15 | 365770.5   | 365718   | 365724.8 | 365548.7       | 365724.8 | 363532.5 | 365724.7583   |
| 16 | 365919.5   | 365863.6 | 365870.8 | 365683.8       | 365870.8 | 363532.5 | 365870.8088   |
| 17 | 366068.6   | 366009.2 | 366016.9 | 365818.8       | 366016.9 | 363532.5 | 366016.8594   |
| 18 | 366217.5   | 366154.8 | 366162.9 | 365953.9       | 366162.9 | 363532.5 | 366162.9099   |
| 19 | 366366.3   | 366300.4 | 366309   | 366089         | 366309   | 363532.5 | 366308.9605   |
| 20 | 366515.3   | 366446   | 366455   | 366224.1       | 366455   | 363532.5 | 366455.011    |
| 21 | 366664.3   | 366591.6 | 366601.1 | 366359.2       | 366601.1 | 363532.5 | 366601.0616   |
| 22 | 366813.2   | 366737.2 | 366747.1 | 366494.3       | 366747.1 | 363532.5 | 366747.1121   |
| 23 | 366962.1   | 366882.8 | 366893.2 | 366629.4       | 366893.2 | 363532.5 | 366893.1627   |
| 24 | 367111     | 367028.4 | 367039.2 | 366764.4       | 367039.2 | 363532.5 | 367039.2132   |
| 25 | 367260     | 367174   | 367185.3 | 366899.5       | 367185.3 | 363532.5 | 367185.2638   |
| 26 | 367408.9   | 367319.6 | 367331.3 | 367034.6       | 367331.3 | 363532.5 | 367331.3143   |
| 27 | 367557.8   | 367465.2 | 367477.4 | 367169.7       | 367477.4 | 363532.5 | 367477.3649   |
| 28 | 367706.8   | 367610.8 | 367623.4 | 367304.8       | 367623.4 | 363532.5 | 367623.4154   |

|    | Interval#2 |          |          |                |          |          |               |
|----|------------|----------|----------|----------------|----------|----------|---------------|
|    | ARIMA_2    | TBATS_2  | ETS_2    | cubic spline_2 | Holt_2   | SES_2    | HoltWinters_2 |
| 1  | 370762.1   | 370777.8 | 370778   | 370772.4       | 370778   | 370421.4 | 370777.9685   |
| 2  | 371091.5   | 371130.5 | 371130.9 | 371123.6       | 371130.9 | 370421.4 | 371130.9371   |
| 3  | 371429     | 371483.3 | 371483.9 | 371474.8       | 371483.9 | 370421.4 | 371483.9056   |
| 4  | 371771.2   | 371836   | 371836.9 | 371826.1       | 371836.9 | 370421.4 | 371836.8741   |
| 5  | 372107.2   | 372188.8 | 372189.9 | 372177.3       | 372189.9 | 370421.4 | 372189.8427   |
| 6  | 372440.6   | 372541.6 | 372542.8 | 372528.5       | 372542.8 | 370421.4 | 372542.8112   |
| 7  | 372778.5   | 372894.3 | 372895.8 | 372879.8       | 372895.8 | 370421.4 | 372895.7798   |
| 8  | 373117.8   | 373247.1 | 373248.8 | 373231         | 373248.8 | 370421.4 | 373248.7483   |
| 9  | 373453.9   | 373599.8 | 373601.7 | 373582.2       | 373601.7 | 370421.4 | 373601.7168   |
| 10 | 373789.3   | 373952.6 | 373954.7 | 373933.4       | 373954.7 | 370421.4 | 373954.6854   |
| 11 | 374127     | 374305.4 | 374307.7 | 374284.7       | 374307.7 | 370421.4 | 374307.6539   |
| 12 | 374464.9   | 374658.1 | 374660.7 | 374635.9       | 374660.7 | 370421.4 | 374660.6224   |

|    |          |          |          |          |          |          |             |
|----|----------|----------|----------|----------|----------|----------|-------------|
| 13 | 374801.2 | 375010.9 | 375013.6 | 374987.1 | 375013.6 | 370421.4 | 375013.591  |
| 14 | 375137.5 | 375363.6 | 375366.6 | 375338.4 | 375366.6 | 370421.4 | 375366.5595 |
| 15 | 375475   | 375716.4 | 375719.6 | 375689.6 | 375719.6 | 370421.4 | 375719.528  |
| 16 | 375812.3 | 376069.2 | 376072.5 | 376040.8 | 376072.6 | 370421.4 | 376072.4966 |
| 17 | 376148.9 | 376421.9 | 376425.5 | 376392   | 376425.5 | 370421.4 | 376425.4651 |
| 18 | 376485.6 | 376774.7 | 376778.5 | 376743.3 | 376778.5 | 370421.4 | 376778.4337 |
| 19 | 376822.8 | 377127.4 | 377131.5 | 377094.5 | 377131.5 | 370421.4 | 377131.4022 |
| 20 | 377159.9 | 377480.2 | 377484.4 | 377445.7 | 377484.4 | 370421.4 | 377484.3707 |
| 21 | 377496.6 | 377833   | 377837.4 | 377797   | 377837.4 | 370421.4 | 377837.3393 |
| 22 | 377833.5 | 378185.7 | 378190.4 | 378148.2 | 378190.4 | 370421.4 | 378190.3078 |
| 23 | 378170.6 | 378538.5 | 378543.3 | 378499.4 | 378543.4 | 370421.4 | 378543.2763 |
| 24 | 378507.5 | 378891.2 | 378896.3 | 378850.6 | 378896.3 | 370421.4 | 378896.2449 |
| 25 | 378844.4 | 379244   | 379249.3 | 379201.9 | 379249.3 | 370421.4 | 379249.2134 |
| 26 | 379181.3 | 379596.8 | 379602.3 | 379553.1 | 379602.3 | 370421.4 | 379602.1819 |
| 27 | 379518.3 | 379949.5 | 379955.2 | 379904.3 | 379955.2 | 370421.4 | 379955.1505 |
| 28 | 379855.3 | 380302.3 | 380308.2 | 380255.6 | 380308.2 | 370421.4 | 380308.119  |

|    | Interval#3 |          |          |              |          |          |             |
|----|------------|----------|----------|--------------|----------|----------|-------------|
|    | ARIMA      | TBATS    | ETS      | cubic spline | Holt     | SES      | HoltWinters |
| 1  | 380391.1   | 380382.9 | 380396.1 | 380375.8     | 380396.2 | 380006.1 | 380396.1414 |
| 2  | 380783.2   | 380753.7 | 380782.2 | 380747.4     | 380782.3 | 380006.1 | 380782.2827 |
| 3  | 381189.1   | 381131.6 | 381168.4 | 381119       | 381168.5 | 380006.1 | 381168.4241 |
| 4  | 381586.1   | 381506.4 | 381554.5 | 381490.7     | 381554.6 | 380006.1 | 381554.5654 |
| 5  | 381974.4   | 381876.6 | 381940.6 | 381862.3     | 381940.8 | 380006.1 | 381940.7068 |
| 6  | 382369.6   | 382246   | 382326.7 | 382234       | 382327   | 380006.1 | 382326.8481 |
| 7  | 382770.3   | 382614.1 | 382712.9 | 382605.6     | 382713.1 | 380006.1 | 382712.9895 |
| 8  | 383165.6   | 382979.5 | 383099   | 382977.2     | 383099.3 | 380006.1 | 383099.1308 |
| 9  | 383557.6   | 383342.9 | 383485.1 | 383348.9     | 383485.4 | 380006.1 | 383485.2722 |
| 10 | 383953.7   | 383704.4 | 383871.2 | 383720.5     | 383871.6 | 380006.1 | 383871.4135 |
| 11 | 384351.7   | 384064   | 384257.4 | 384092.1     | 384257.7 | 380006.1 | 384257.5549 |
| 12 | 384746.7   | 384421.5 | 384643.5 | 384463.8     | 384643.9 | 380006.1 | 384643.6962 |
| 13 | 385140.6   | 384777.1 | 385029.6 | 384835.4     | 385030.1 | 380006.1 | 385029.8376 |
| 14 | 385536.8   | 385130.8 | 385415.7 | 385207.1     | 385416.2 | 380006.1 | 385415.9789 |
| 15 | 385933.4   | 385482.5 | 385801.9 | 385578.7     | 385802.4 | 380006.1 | 385802.1203 |
| 16 | 386328.5   | 385832.2 | 386188   | 385950.3     | 386188.5 | 380006.1 | 386188.2616 |
| 17 | 386723.3   | 386180.1 | 386574.1 | 386322       | 386574.7 | 380006.1 | 386574.403  |
| 18 | 387119.3   | 386526   | 386960.2 | 386693.6     | 386960.9 | 380006.1 | 386960.5443 |
| 19 | 387515.3   | 386870   | 387346.4 | 387065.3     | 387347   | 380006.1 | 387346.6857 |
| 20 | 387910.6   | 387212.1 | 387732.5 | 387436.9     | 387733.2 | 380006.1 | 387732.827  |
| 21 | 388305.9   | 387552.4 | 388118.6 | 387808.5     | 388119.3 | 380006.1 | 388118.9684 |
| 22 | 388701.7   | 387890.8 | 388504.7 | 388180.2     | 388505.5 | 380006.1 | 388505.1097 |
| 23 | 389097.4   | 388227.3 | 388890.9 | 388551.8     | 388891.7 | 380006.1 | 388891.2511 |
| 24 | 389492.8   | 388562   | 389277   | 388923.4     | 389277.8 | 380006.1 | 389277.3924 |
| 25 | 389888.3   | 388894.8 | 389663.1 | 389295.1     | 389664   | 380006.1 | 389663.5338 |
| 26 | 390284     | 389225.8 | 390049.2 | 389666.7     | 390050.1 | 380006.1 | 390049.6751 |
| 27 | 390679.6   | 389555   | 390435.4 | 390038.4     | 390436.3 | 380006.1 | 390435.8165 |
| 28 | 391075     | 389882.4 | 390821.5 | 390410       | 390822.5 | 380006.1 | 390821.9578 |

**Table S3: KSA forecasted recoveries**

|    | Interval#1 |          |          |                |          |          |               |
|----|------------|----------|----------|----------------|----------|----------|---------------|
|    | ARIMA_1    | TBATS_1  | ETS_1    | cubic spline_1 | Holt_1   | SES_1    | HoltWinters_1 |
| 1  | 355991.6   | 355991.3 | 355992   | 355997.6       | 355992   | 355831.5 | 355991.985    |
| 2  | 356151.4   | 356150.4 | 356151   | 356157.2       | 356151   | 355831.5 | 356150.9699   |
| 3  | 356311.2   | 356309.5 | 356309.9 | 356316.8       | 356310   | 355831.5 | 356309.9549   |
| 4  | 356471     | 356468.6 | 356468.9 | 356476.5       | 356468.9 | 355831.5 | 356468.9398   |
| 5  | 356630.7   | 356627.7 | 356627.9 | 356636.1       | 356627.9 | 355831.5 | 356627.9248   |
| 6  | 356790.5   | 356786.9 | 356786.9 | 356795.7       | 356786.9 | 355831.5 | 356786.9097   |
| 7  | 356950.3   | 356946.1 | 356945.9 | 356955.3       | 356945.9 | 355831.5 | 356945.8947   |
| 8  | 357110     | 357105.3 | 357104.9 | 357115         | 357104.9 | 355831.5 | 357104.8797   |
| 9  | 357269.8   | 357264.5 | 357263.8 | 357274.6       | 357263.9 | 355831.5 | 357263.8646   |
| 10 | 357429.6   | 357423.7 | 357422.8 | 357434.2       | 357422.8 | 355831.5 | 357422.8496   |
| 11 | 357589.4   | 357582.9 | 357581.8 | 357593.8       | 357581.8 | 355831.5 | 357581.8345   |
| 12 | 357749.1   | 357742.2 | 357740.8 | 357753.5       | 357740.8 | 355831.5 | 357740.8195   |
| 13 | 357908.9   | 357901.5 | 357899.8 | 357913.1       | 357899.8 | 355831.5 | 357899.8044   |
| 14 | 358068.7   | 358060.8 | 358058.8 | 358072.7       | 358058.8 | 355831.5 | 358058.7894   |
| 15 | 358228.4   | 358220.1 | 358217.7 | 358232.4       | 358217.7 | 355831.5 | 358217.7743   |
| 16 | 358388.2   | 358379.4 | 358376.7 | 358392         | 358376.7 | 355831.5 | 358376.7593   |
| 17 | 358548     | 358538.7 | 358535.7 | 358551.6       | 358535.7 | 355831.5 | 358535.7443   |
| 18 | 358707.8   | 358698.1 | 358694.7 | 358711.2       | 358694.7 | 355831.5 | 358694.7292   |
| 19 | 358867.5   | 358857.5 | 358853.7 | 358870.9       | 358853.7 | 355831.5 | 358853.7142   |
| 20 | 359027.3   | 359016.9 | 359012.7 | 359030.5       | 359012.7 | 355831.5 | 359012.6991   |
| 21 | 359187.1   | 359176.3 | 359171.6 | 359190.1       | 359171.6 | 355831.5 | 359171.6841   |
| 22 | 359346.9   | 359335.7 | 359330.6 | 359349.7       | 359330.6 | 355831.5 | 359330.669    |
| 23 | 359506.6   | 359495.2 | 359489.6 | 359509.4       | 359489.6 | 355831.5 | 359489.654    |
| 24 | 359666.4   | 359654.6 | 359648.6 | 359669         | 359648.6 | 355831.5 | 359648.639    |
| 25 | 359826.2   | 359814.1 | 359807.6 | 359828.6       | 359807.6 | 355831.5 | 359807.6239   |
| 26 | 359985.9   | 359973.6 | 359966.6 | 359988.2       | 359966.6 | 355831.5 | 359966.6089   |
| 27 | 360145.7   | 360133.1 | 360125.5 | 360147.9       | 360125.5 | 355831.5 | 360125.5938   |
| 28 | 360305.5   | 360292.7 | 360284.5 | 360307.5       | 360284.5 | 355831.5 | 360284.5788   |

|    | Interval#2 |          |          |                |          |          |               |
|----|------------|----------|----------|----------------|----------|----------|---------------|
|    | ARIMA_2    | TBATS_2  | ETS_2    | cubic spline_2 | Holt_2   | SES_2    | HoltWinters_2 |
| 1  | 362305.3   | 362306.7 | 362310.4 | 362322.8       | 362310.4 | 362035.5 | 362310.3547   |
| 2  | 362576     | 362578.2 | 362582.7 | 362597.7       | 362582.7 | 362035.5 | 362582.7094   |
| 3  | 362846.6   | 362849.7 | 362855.1 | 362872.7       | 362855.1 | 362035.5 | 362855.0641   |
| 4  | 363117.3   | 363121.3 | 363127.4 | 363147.6       | 363127.4 | 362035.5 | 363127.4188   |
| 5  | 363388     | 363392.8 | 363399.8 | 363422.5       | 363399.8 | 362035.5 | 363399.7735   |
| 6  | 363658.6   | 363664.5 | 363672.1 | 363697.4       | 363672.1 | 362035.5 | 363672.1282   |
| 7  | 363929.3   | 363936.1 | 363944.5 | 363972.3       | 363944.5 | 362035.5 | 363944.4829   |
| 8  | 364200     | 364207.9 | 364216.8 | 364247.2       | 364216.9 | 362035.5 | 364216.8376   |
| 9  | 364470.6   | 364479.6 | 364489.2 | 364522.1       | 364489.2 | 362035.5 | 364489.1923   |
| 10 | 364741.3   | 364751.4 | 364761.6 | 364797         | 364761.6 | 362035.5 | 364761.547    |
| 11 | 365012     | 365023.3 | 365033.9 | 365071.9       | 365033.9 | 362035.5 | 365033.9017   |
| 12 | 365282.7   | 365295.1 | 365306.3 | 365346.9       | 365306.3 | 362035.5 | 365306.2564   |

|    |          |          |          |          |          |          |             |
|----|----------|----------|----------|----------|----------|----------|-------------|
| 13 | 365553.3 | 365567.1 | 365578.6 | 365621.8 | 365578.6 | 362035.5 | 365578.6111 |
| 14 | 365824   | 365839   | 365851   | 365896.7 | 365851   | 362035.5 | 365850.9658 |
| 15 | 366094.7 | 366111   | 366123.3 | 366171.6 | 366123.4 | 362035.5 | 366123.3204 |
| 16 | 366365.3 | 366383.1 | 366395.7 | 366446.5 | 366395.7 | 362035.5 | 366395.6751 |
| 17 | 366636   | 366655.2 | 366668   | 366721.4 | 366668.1 | 362035.5 | 366668.0298 |
| 18 | 366906.7 | 366927.3 | 366940.4 | 366996.3 | 366940.4 | 362035.5 | 366940.3845 |
| 19 | 367177.3 | 367199.5 | 367212.8 | 367271.2 | 367212.8 | 362035.5 | 367212.7392 |
| 20 | 367448   | 367471.7 | 367485.1 | 367546.1 | 367485.1 | 362035.5 | 367485.0939 |
| 21 | 367718.7 | 367744   | 367757.5 | 367821.1 | 367757.5 | 362035.5 | 367757.4486 |
| 22 | 367989.4 | 368016.3 | 368029.8 | 368096   | 368029.9 | 362035.5 | 368029.8033 |
| 23 | 368260   | 368288.6 | 368302.2 | 368370.9 | 368302.2 | 362035.5 | 368302.158  |
| 24 | 368530.7 | 368561   | 368574.5 | 368645.8 | 368574.6 | 362035.5 | 368574.5127 |
| 25 | 368801.4 | 368833.4 | 368846.9 | 368920.7 | 368846.9 | 362035.5 | 368846.8674 |
| 26 | 369072   | 369105.9 | 369119.2 | 369195.6 | 369119.3 | 362035.5 | 369119.2221 |
| 27 | 369342.7 | 369378.4 | 369391.6 | 369470.5 | 369391.6 | 362035.5 | 369391.5768 |
| 28 | 369613.4 | 369650.9 | 369664   | 369745.4 | 369664   | 362035.5 | 369663.9315 |

|    | Interval#3 |          |          |              |          |          |             |
|----|------------|----------|----------|--------------|----------|----------|-------------|
|    | ARIMA      | TBATS    | ETS      | cubic spline | Holt     | SES      | HoltWinters |
| 1  | 371647     | 371648.8 | 371656   | 371676.6     | 371656   | 371310.9 | 371656.0059 |
| 2  | 371985.8   | 371988.6 | 371998   | 372029.7     | 371998   | 371310.9 | 371998.0119 |
| 3  | 372324.6   | 372328.4 | 372340   | 372382.8     | 372340   | 371310.9 | 372340.0178 |
| 4  | 372663.5   | 372668.3 | 372682   | 372735.8     | 372682   | 371310.9 | 372682.0238 |
| 5  | 373002.3   | 373008.3 | 373024.1 | 373088.9     | 373024   | 371310.9 | 373024.0297 |
| 6  | 373341.2   | 373348.2 | 373366.1 | 373442       | 373366   | 371310.9 | 373366.0357 |
| 7  | 373680     | 373688.3 | 373708.1 | 373795       | 373708   | 371310.9 | 373708.0416 |
| 8  | 374018.8   | 374028.4 | 374050.1 | 374148.1     | 374050   | 371310.9 | 374050.0476 |
| 9  | 374357.7   | 374368.5 | 374392.1 | 374501.2     | 374392.1 | 371310.9 | 374392.0535 |
| 10 | 374696.5   | 374708.7 | 374734.1 | 374854.2     | 374734.1 | 371310.9 | 374734.0595 |
| 11 | 375035.4   | 375048.9 | 375076.1 | 375207.3     | 375076.1 | 371310.9 | 375076.0654 |
| 12 | 375374.2   | 375389.2 | 375418.1 | 375560.4     | 375418.1 | 371310.9 | 375418.0714 |
| 13 | 375713     | 375729.6 | 375760.1 | 375913.4     | 375760.1 | 371310.9 | 375760.0773 |
| 14 | 376051.9   | 376070   | 376102.2 | 376266.5     | 376102.1 | 371310.9 | 376102.0832 |
| 15 | 376390.7   | 376410.4 | 376444.2 | 376619.6     | 376444.1 | 371310.9 | 376444.0892 |
| 16 | 376729.6   | 376750.9 | 376786.2 | 376972.6     | 376786.1 | 371310.9 | 376786.0951 |
| 17 | 377068.4   | 377091.4 | 377128.2 | 377325.7     | 377128.1 | 371310.9 | 377128.1011 |
| 18 | 377407.2   | 377432   | 377470.2 | 377678.8     | 377470.1 | 371310.9 | 377470.107  |
| 19 | 377746.1   | 377772.7 | 377812.2 | 378031.8     | 377812.1 | 371310.9 | 377812.113  |
| 20 | 378084.9   | 378113.4 | 378154.2 | 378384.9     | 378154.1 | 371310.9 | 378154.1189 |
| 21 | 378423.8   | 378454.1 | 378496.2 | 378738       | 378496.1 | 371310.9 | 378496.1249 |
| 22 | 378762.6   | 378794.9 | 378838.2 | 379091       | 378838.1 | 371310.9 | 378838.1308 |
| 23 | 379101.4   | 379135.8 | 379180.3 | 379444.1     | 379180.1 | 371310.9 | 379180.1368 |
| 24 | 379440.3   | 379476.7 | 379522.3 | 379797.2     | 379522.1 | 371310.9 | 379522.1427 |
| 25 | 379779.1   | 379817.6 | 379864.3 | 380150.2     | 379864.1 | 371310.9 | 379864.1487 |
| 26 | 380118     | 380158.6 | 380206.3 | 380503.3     | 380206.1 | 371310.9 | 380206.1546 |
| 27 | 380456.8   | 380499.7 | 380548.3 | 380856.4     | 380548.1 | 371310.9 | 380548.1605 |
| 28 | 380795.6   | 380840.8 | 380890.3 | 381209.4     | 380890.2 | 371310.9 | 380890.1665 |

**Table S4: KSA forecasted deaths**

|    | Interval#1 |          |          |                |          |         |               |
|----|------------|----------|----------|----------------|----------|---------|---------------|
|    | ARIMA_1    | TBATS_1  | ETS_1    | cubic spline_1 | Holt_1   | SES_1   | HoltWinters_1 |
| 1  | 6306.485   | 6306.576 | 6306.568 | 6306.201       | 6306.568 | 6301.95 | 6306.568324   |
| 2  | 6311.288   | 6311.251 | 6311.243 | 6310.602       | 6311.243 | 6301.95 | 6311.243184   |
| 3  | 6315.803   | 6315.925 | 6315.918 | 6315.003       | 6315.917 | 6301.95 | 6315.918045   |
| 4  | 6320.578   | 6320.601 | 6320.593 | 6319.403       | 6320.592 | 6301.95 | 6320.592906   |
| 5  | 6325.118   | 6325.276 | 6325.268 | 6323.804       | 6325.267 | 6301.95 | 6325.267767   |
| 6  | 6329.871   | 6329.952 | 6329.943 | 6328.204       | 6329.941 | 6301.95 | 6329.942628   |
| 7  | 6334.431   | 6334.628 | 6334.618 | 6332.605       | 6334.616 | 6301.95 | 6334.617489   |
| 8  | 6339.166   | 6339.305 | 6339.293 | 6337.006       | 6339.291 | 6301.95 | 6339.29235    |
| 9  | 6343.743   | 6343.982 | 6343.968 | 6341.406       | 6343.966 | 6301.95 | 6343.96721    |
| 10 | 6348.462   | 6348.659 | 6348.643 | 6345.807       | 6348.64  | 6301.95 | 6348.642071   |
| 11 | 6353.053   | 6353.337 | 6353.318 | 6350.207       | 6353.315 | 6301.95 | 6353.316932   |
| 12 | 6357.76    | 6358.015 | 6357.992 | 6354.608       | 6357.99  | 6301.95 | 6357.991793   |
| 13 | 6362.361   | 6362.693 | 6362.667 | 6359.009       | 6362.664 | 6301.95 | 6362.666654   |
| 14 | 6367.059   | 6367.372 | 6367.342 | 6363.409       | 6367.339 | 6301.95 | 6367.341515   |
| 15 | 6371.669   | 6372.051 | 6372.017 | 6367.81        | 6372.014 | 6301.95 | 6372.016376   |
| 16 | 6376.358   | 6376.73  | 6376.692 | 6372.21        | 6376.688 | 6301.95 | 6376.691236   |
| 17 | 6380.976   | 6381.41  | 6381.367 | 6376.611       | 6381.363 | 6301.95 | 6381.366097   |
| 18 | 6385.659   | 6386.09  | 6386.042 | 6381.012       | 6386.038 | 6301.95 | 6386.040958   |
| 19 | 6390.283   | 6390.77  | 6390.717 | 6385.412       | 6390.712 | 6301.95 | 6390.715819   |
| 20 | 6394.959   | 6395.451 | 6395.392 | 6389.813       | 6395.387 | 6301.95 | 6395.39068    |
| 21 | 6399.588   | 6400.132 | 6400.067 | 6394.213       | 6400.062 | 6301.95 | 6400.065541   |
| 22 | 6404.261   | 6404.813 | 6404.742 | 6398.614       | 6404.737 | 6301.95 | 6404.740402   |
| 23 | 6408.894   | 6409.495 | 6409.417 | 6403.015       | 6409.411 | 6301.95 | 6409.415263   |
| 24 | 6413.562   | 6414.177 | 6414.092 | 6407.415       | 6414.086 | 6301.95 | 6414.090123   |
| 25 | 6418.199   | 6418.86  | 6418.767 | 6411.816       | 6418.761 | 6301.95 | 6418.764984   |
| 26 | 6422.865   | 6423.542 | 6423.441 | 6416.216       | 6423.435 | 6301.95 | 6423.439845   |
| 27 | 6427.504   | 6428.225 | 6428.116 | 6420.617       | 6428.11  | 6301.95 | 6428.114706   |
| 28 | 6432.167   | 6432.909 | 6432.791 | 6425.018       | 6432.785 | 6301.95 | 6432.789567   |

|    | Interval#2 |          |          |                |          |         |               |
|----|------------|----------|----------|----------------|----------|---------|---------------|
|    | ARIMA_2    | TBATS_2  | ETS_2    | cubic spline_2 | Holt_2   | SES_2   | HoltWinters_2 |
| 1  | 6415.92    | 6416.259 | 6416.169 | 6416.31        | 6416.169 | 6411.96 | 6416.168846   |
| 2  | 6420.047   | 6420.507 | 6420.271 | 6420.556       | 6420.271 | 6411.96 | 6420.270697   |
| 3  | 6423.986   | 6424.819 | 6424.372 | 6424.802       | 6424.372 | 6411.96 | 6424.372548   |
| 4  | 6428.095   | 6429.2   | 6428.474 | 6429.048       | 6428.474 | 6411.96 | 6428.4744     |
| 5  | 6432.051   | 6433.655 | 6432.576 | 6433.295       | 6432.576 | 6411.96 | 6432.576251   |
| 6  | 6436.146   | 6438.191 | 6436.678 | 6437.541       | 6436.677 | 6411.96 | 6436.678102   |
| 7  | 6440.115   | 6442.812 | 6440.78  | 6441.787       | 6440.779 | 6411.96 | 6440.779954   |
| 8  | 6444.197   | 6447.524 | 6444.881 | 6446.033       | 6444.881 | 6411.96 | 6444.881805   |
| 9  | 6448.177   | 6452.332 | 6448.983 | 6450.279       | 6448.982 | 6411.96 | 6448.983656   |
| 10 | 6452.249   | 6457.242 | 6453.085 | 6454.525       | 6453.084 | 6411.96 | 6453.085507   |
| 11 | 6456.238   | 6462.26  | 6457.187 | 6458.771       | 6457.186 | 6411.96 | 6457.187359   |
| 12 | 6460.303   | 6467.39  | 6461.288 | 6463.017       | 6461.287 | 6411.96 | 6461.28921    |

|    |          |          |          |          |          |         |             |
|----|----------|----------|----------|----------|----------|---------|-------------|
| 13 | 6464.299 | 6472.638 | 6465.39  | 6467.263 | 6465.389 | 6411.96 | 6465.391061 |
| 14 | 6468.357 | 6478.009 | 6469.492 | 6471.509 | 6469.491 | 6411.96 | 6469.492913 |
| 15 | 6472.359 | 6483.509 | 6473.594 | 6475.755 | 6473.592 | 6411.96 | 6473.594764 |
| 16 | 6476.411 | 6489.142 | 6477.695 | 6480.002 | 6477.694 | 6411.96 | 6477.696615 |
| 17 | 6480.418 | 6494.914 | 6481.797 | 6484.248 | 6481.796 | 6411.96 | 6481.798467 |
| 18 | 6484.466 | 6500.83  | 6485.899 | 6488.494 | 6485.898 | 6411.96 | 6485.900318 |
| 19 | 6488.477 | 6506.895 | 6490.001 | 6492.74  | 6489.999 | 6411.96 | 6490.002169 |
| 20 | 6492.522 | 6513.114 | 6494.103 | 6496.986 | 6494.101 | 6411.96 | 6494.104021 |
| 21 | 6496.536 | 6519.492 | 6498.204 | 6501.232 | 6498.203 | 6411.96 | 6498.205872 |
| 22 | 6500.578 | 6526.034 | 6502.306 | 6505.478 | 6502.304 | 6411.96 | 6502.307723 |
| 23 | 6504.594 | 6532.745 | 6506.408 | 6509.724 | 6506.406 | 6411.96 | 6506.409575 |
| 24 | 6508.634 | 6539.63  | 6510.51  | 6513.97  | 6510.508 | 6411.96 | 6510.511426 |
| 25 | 6512.652 | 6546.693 | 6514.611 | 6518.216 | 6514.609 | 6411.96 | 6514.613277 |
| 26 | 6516.69  | 6553.939 | 6518.713 | 6522.463 | 6518.711 | 6411.96 | 6518.715129 |
| 27 | 6520.71  | 6561.374 | 6522.815 | 6526.709 | 6522.813 | 6411.96 | 6522.81698  |
| 28 | 6524.746 | 6569.001 | 6526.917 | 6530.955 | 6526.914 | 6411.96 | 6526.918831 |

|    | Interval#3 |          |          |              |          |          |             |
|----|------------|----------|----------|--------------|----------|----------|-------------|
|    | ARIMA      | TBATS    | ETS      | cubic spline | Holt     | SES      | HoltWinters |
| 1  | 6546.37    | 6546.586 | 6546.258 | 6545.859     | 6546.258 | 6540.949 | 6546.257605 |
| 2  | 6551.447   | 6551.983 | 6551.508 | 6550.916     | 6551.508 | 6540.949 | 6551.507476 |
| 3  | 6556.789   | 6557.829 | 6556.758 | 6555.974     | 6556.757 | 6540.949 | 6556.757347 |
| 4  | 6561.891   | 6563.546 | 6562.007 | 6561.031     | 6562.007 | 6540.949 | 6562.007218 |
| 5  | 6567.21    | 6569.673 | 6567.257 | 6566.088     | 6567.257 | 6540.949 | 6567.257089 |
| 6  | 6572.332   | 6575.726 | 6572.507 | 6571.145     | 6572.507 | 6540.949 | 6572.50696  |
| 7  | 6577.633   | 6582.16  | 6577.757 | 6576.203     | 6577.757 | 6540.949 | 6577.756831 |
| 8  | 6582.773   | 6588.569 | 6583.007 | 6581.26      | 6583.007 | 6540.949 | 6583.006702 |
| 9  | 6588.058   | 6595.334 | 6588.257 | 6586.317     | 6588.257 | 6540.949 | 6588.256573 |
| 10 | 6593.211   | 6602.116 | 6593.507 | 6591.374     | 6593.507 | 6540.949 | 6593.506445 |
| 11 | 6598.484   | 6609.235 | 6598.757 | 6596.432     | 6598.757 | 6540.949 | 6598.756316 |
| 12 | 6603.649   | 6616.408 | 6604.007 | 6601.489     | 6604.006 | 6540.949 | 6604.006187 |
| 13 | 6608.911   | 6623.903 | 6609.257 | 6606.546     | 6609.256 | 6540.949 | 6609.256058 |
| 14 | 6614.085   | 6631.484 | 6614.507 | 6611.603     | 6614.506 | 6540.949 | 6614.505929 |
| 15 | 6619.339   | 6639.376 | 6619.757 | 6616.661     | 6619.756 | 6540.949 | 6619.7558   |
| 16 | 6624.521   | 6647.382 | 6625.007 | 6621.718     | 6625.006 | 6540.949 | 6625.005671 |
| 17 | 6629.768   | 6655.691 | 6630.257 | 6626.775     | 6630.256 | 6540.949 | 6630.255542 |
| 18 | 6634.956   | 6664.138 | 6635.506 | 6631.832     | 6635.506 | 6540.949 | 6635.505414 |
| 19 | 6640.197   | 6672.883 | 6640.756 | 6636.89      | 6640.756 | 6540.949 | 6640.755285 |
| 20 | 6645.39    | 6681.787 | 6646.006 | 6641.947     | 6646.006 | 6540.949 | 6646.005156 |
| 21 | 6650.627   | 6690.985 | 6651.256 | 6647.004     | 6651.256 | 6540.949 | 6651.255027 |
| 22 | 6655.824   | 6700.361 | 6656.506 | 6652.061     | 6656.505 | 6540.949 | 6656.504898 |
| 23 | 6661.058   | 6710.029 | 6661.756 | 6657.118     | 6661.755 | 6540.949 | 6661.754769 |
| 24 | 6666.258   | 6719.892 | 6667.006 | 6662.176     | 6667.005 | 6540.949 | 6667.00464  |
| 25 | 6671.488   | 6730.046 | 6672.256 | 6667.233     | 6672.255 | 6540.949 | 6672.254511 |
| 26 | 6676.691   | 6740.409 | 6677.506 | 6672.29      | 6677.505 | 6540.949 | 6677.504382 |
| 27 | 6681.919   | 6751.063 | 6682.756 | 6677.347     | 6682.755 | 6540.949 | 6682.754254 |
| 28 | 6687.125   | 6761.941 | 6688.006 | 6682.405     | 6688.005 | 6540.949 | 6688.004125 |

**Table S5: Riyadh forecasted confirmed cases**

|    | Interval#1 |          |          |                |          |          |               |
|----|------------|----------|----------|----------------|----------|----------|---------------|
|    | ARIMA_1    | TBATS_1  | ETS_1    | cubic spline_1 | Holt_1   | SES_1    | HoltWinters_1 |
| 1  | 75386.26   | 75390.96 | 75391.32 | 75390.37       | 75392.72 | 75345.52 | 75392.72405   |
| 2  | 75427.07   | 75435.1  | 75436.14 | 75435.81       | 75439.97 | 75345.52 | 75439.97509   |
| 3  | 75472.53   | 75477.6  | 75479.8  | 75481.25       | 75487.22 | 75345.52 | 75487.22613   |
| 4  | 75518.9    | 75518.52 | 75522.33 | 75526.7        | 75534.47 | 75345.52 | 75534.47717   |
| 5  | 75562.26   | 75557.92 | 75563.75 | 75572.14       | 75581.71 | 75345.52 | 75581.7282    |
| 6  | 75604.15   | 75595.86 | 75604.09 | 75617.58       | 75628.96 | 75345.52 | 75628.97924   |
| 7  | 75647.74   | 75632.4  | 75643.38 | 75663.02       | 75676.21 | 75345.52 | 75676.23028   |
| 8  | 75692.84   | 75667.57 | 75681.65 | 75708.46       | 75723.46 | 75345.52 | 75723.48132   |
| 9  | 75737.15   | 75701.45 | 75718.92 | 75753.9        | 75770.71 | 75345.52 | 75770.73235   |
| 10 | 75780.2    | 75734.06 | 75755.23 | 75799.35       | 75817.96 | 75345.52 | 75817.98339   |
| 11 | 75823.44   | 75765.47 | 75790.59 | 75844.79       | 75865.21 | 75345.52 | 75865.23443   |
| 12 | 75867.63   | 75795.71 | 75825.03 | 75890.23       | 75912.46 | 75345.52 | 75912.48547   |
| 13 | 75911.94   | 75824.83 | 75858.57 | 75935.67       | 75959.71 | 75345.52 | 75959.7365    |
| 14 | 75955.62   | 75852.86 | 75891.24 | 75981.11       | 76006.95 | 75345.52 | 76006.98754   |
| 15 | 75999.04   | 75879.86 | 75923.06 | 76026.55       | 76054.2  | 75345.52 | 76054.23858   |
| 16 | 76042.83   | 75905.86 | 75954.06 | 76072          | 76101.45 | 75345.52 | 76101.48962   |
| 17 | 76086.91   | 75930.89 | 75984.25 | 76117.44       | 76148.7  | 75345.52 | 76148.74065   |
| 18 | 76130.8    | 75954.99 | 76013.65 | 76162.88       | 76195.95 | 75345.52 | 76195.99169   |
| 19 | 76174.45   | 75978.2  | 76042.29 | 76208.32       | 76243.2  | 75345.52 | 76243.24273   |
| 20 | 76218.15   | 76000.55 | 76070.18 | 76253.76       | 76290.45 | 75345.52 | 76290.49377   |
| 21 | 76262.04   | 76022.07 | 76097.35 | 76299.21       | 76337.7  | 75345.52 | 76337.7448    |
| 22 | 76305.95   | 76042.79 | 76123.81 | 76344.65       | 76384.95 | 75345.52 | 76384.99584   |
| 23 | 76349.73   | 76062.74 | 76149.58 | 76390.09       | 76432.19 | 75345.52 | 76432.24688   |
| 24 | 76393.46   | 76081.95 | 76174.68 | 76435.53       | 76479.44 | 75345.52 | 76479.49792   |
| 25 | 76437.27   | 76100.45 | 76199.13 | 76480.97       | 76526.69 | 75345.52 | 76526.74895   |
| 26 | 76481.13   | 76118.26 | 76222.94 | 76526.41       | 76573.94 | 75345.52 | 76573.99999   |
| 27 | 76524.95   | 76135.41 | 76246.14 | 76571.86       | 76621.19 | 75345.52 | 76621.25103   |
| 28 | 76568.73   | 76151.92 | 76268.73 | 76617.3        | 76668.44 | 75345.52 | 76668.50207   |

|    | Interval#2 |          |          |                |          |         |               |
|----|------------|----------|----------|----------------|----------|---------|---------------|
|    | ARIMA_2    | TBATS_2  | ETS_2    | cubic spline_2 | Holt_2   | SES_2   | HoltWinters_2 |
| 1  | 78186.11   | 78182.55 | 78182.48 | 78174.8        | 78187.61 | 78018.3 | 78187.61684   |
| 2  | 78349.7    | 78342.17 | 78342.15 | 78337.19       | 78356.05 | 78018.3 | 78356.0503    |
| 3  | 78514.85   | 78496.4  | 78497.62 | 78499.58       | 78524.48 | 78018.3 | 78524.48377   |
| 4  | 78686.15   | 78645.41 | 78649.01 | 78661.97       | 78692.92 | 78018.3 | 78692.91723   |
| 5  | 78858.11   | 78789.39 | 78796.41 | 78824.37       | 78861.35 | 78018.3 | 78861.35069   |
| 6  | 79027.74   | 78928.5  | 78939.94 | 78986.76       | 79029.79 | 78018.3 | 79029.78415   |
| 7  | 79193.84   | 79062.91 | 79079.7  | 79149.15       | 79198.22 | 78018.3 | 79198.21762   |
| 8  | 79360.67   | 79192.78 | 79215.79 | 79311.54       | 79366.66 | 78018.3 | 79366.65108   |
| 9  | 79529.7    | 79318.25 | 79348.29 | 79473.94       | 79535.09 | 78018.3 | 79535.08454   |
| 10 | 79700.42   | 79439.49 | 79477.32 | 79636.33       | 79703.52 | 78018.3 | 79703.518     |
| 11 | 79869.91   | 79556.62 | 79602.95 | 79798.72       | 79871.96 | 78018.3 | 79871.95147   |
| 12 | 80037.82   | 79669.8  | 79725.28 | 79961.11       | 80040.39 | 78018.3 | 80040.38493   |



|    |          |          |          |          |          |         |             |
|----|----------|----------|----------|----------|----------|---------|-------------|
| 13 | 80205.22 | 79779.15 | 79844.4  | 80123.51 | 80208.83 | 78018.3 | 80208.81839 |
| 14 | 80373.84 | 79884.81 | 79960.38 | 80285.9  | 80377.26 | 78018.3 | 80377.25185 |
| 15 | 80543.37 | 79986.9  | 80073.31 | 80448.29 | 80545.7  | 78018.3 | 80545.68532 |
| 16 | 80712.79 | 80085.53 | 80183.28 | 80610.68 | 80714.13 | 78018.3 | 80714.11878 |
| 17 | 80881.25 | 80180.83 | 80290.36 | 80773.08 | 80882.57 | 78018.3 | 80882.55224 |
| 18 | 81049.32 | 80272.91 | 80394.62 | 80935.47 | 81051    | 78018.3 | 81050.9857  |
| 19 | 81217.75 | 80361.88 | 80496.14 | 81097.86 | 81219.44 | 78018.3 | 81219.41917 |
| 20 | 81386.81 | 80447.84 | 80594.99 | 81260.25 | 81387.87 | 78018.3 | 81387.85263 |
| 21 | 81555.93 | 80530.9  | 80691.24 | 81422.65 | 81556.31 | 78018.3 | 81556.28609 |
| 22 | 81724.67 | 80611.14 | 80784.96 | 81585.04 | 81724.74 | 78018.3 | 81724.71955 |
| 23 | 81893.06 | 80688.68 | 80876.22 | 81747.43 | 81893.17 | 78018.3 | 81893.15302 |
| 24 | 82061.56 | 80763.59 | 80965.09 | 81909.82 | 82061.61 | 78018.3 | 82061.58648 |
| 25 | 82230.36 | 80835.98 | 81051.61 | 82072.22 | 82230.04 | 78018.3 | 82230.01994 |
| 26 | 82399.31 | 80905.91 | 81135.86 | 82234.61 | 82398.48 | 78018.3 | 82398.4534  |
| 27 | 82568.09 | 80973.48 | 81217.9  | 82397    | 82566.91 | 78018.3 | 82566.88687 |
| 28 | 82736.68 | 81038.77 | 81297.78 | 82559.39 | 82735.35 | 78018.3 | 82735.32033 |

|    | Interval#3 |          |          |              |          |          |             |
|----|------------|----------|----------|--------------|----------|----------|-------------|
|    | ARIMA      | TBATS    | ETS      | cubic spline | Holt     | SES      | HoltWinters |
| 1  | 82931.01   | 82915.09 | 82918.86 | 82919.31     | 82924.15 | 82738.06 | 82924.19006 |
| 2  | 83129.88   | 83089.4  | 83096.3  | 83103.1      | 83110.84 | 82738.06 | 83110.91269 |
| 3  | 83331.84   | 83256.98 | 83269.22 | 83286.89     | 83297.53 | 82738.06 | 83297.63532 |
| 4  | 83523.91   | 83418.08 | 83437.75 | 83470.69     | 83484.22 | 82738.06 | 83484.35795 |
| 5  | 83714.11   | 83572.97 | 83601.99 | 83654.48     | 83670.92 | 82738.06 | 83671.08058 |
| 6  | 83906.09   | 83721.87 | 83762.06 | 83838.27     | 83857.61 | 82738.06 | 83857.80321 |
| 7  | 84104.91   | 83865.02 | 83918.05 | 84022.06     | 84044.3  | 82738.06 | 84044.52584 |
| 8  | 84303.67   | 84002.64 | 84070.07 | 84205.85     | 84230.99 | 82738.06 | 84231.24847 |
| 9  | 84499.82   | 84134.94 | 84218.23 | 84389.65     | 84417.68 | 82738.06 | 84417.9711  |
| 10 | 84692.18   | 84262.14 | 84362.62 | 84573.44     | 84604.38 | 82738.06 | 84604.69373 |
| 11 | 84885.81   | 84384.42 | 84503.33 | 84757.23     | 84791.07 | 82738.06 | 84791.41636 |
| 12 | 85081.78   | 84501.98 | 84640.47 | 84941.02     | 84977.76 | 82738.06 | 84978.13899 |
| 13 | 85279.45   | 84614.99 | 84774.12 | 85124.81     | 85164.45 | 82738.06 | 85164.86162 |
| 14 | 85475.52   | 84723.64 | 84904.36 | 85308.6      | 85351.15 | 82738.06 | 85351.58425 |
| 15 | 85669.98   | 84828.1  | 85031.3  | 85492.4      | 85537.84 | 82738.06 | 85538.30688 |
| 16 | 85864      | 84928.52 | 85155.01 | 85676.19     | 85724.53 | 82738.06 | 85725.02951 |
| 17 | 86059.47   | 85025.06 | 85275.56 | 85859.98     | 85911.22 | 82738.06 | 85911.75214 |
| 18 | 86255.83   | 85117.87 | 85393.06 | 86043.77     | 86097.91 | 82738.06 | 86098.47477 |
| 19 | 86451.98   | 85207.1  | 85507.56 | 86227.56     | 86284.61 | 82738.06 | 86285.1974  |
| 20 | 86647.05   | 85292.88 | 85619.15 | 86411.35     | 86471.3  | 82738.06 | 86471.92003 |
| 21 | 86841.78   | 85375.35 | 85727.91 | 86595.15     | 86657.99 | 82738.06 | 86658.64266 |
| 22 | 87036.95   | 85454.63 | 85833.89 | 86778.94     | 86844.68 | 82738.06 | 86845.36529 |
| 23 | 87232.81   | 85530.85 | 85937.18 | 86962.73     | 87031.37 | 82738.06 | 87032.08792 |
| 24 | 87428.66   | 85604.12 | 86037.85 | 87146.52     | 87218.07 | 82738.06 | 87218.81055 |
| 25 | 87624.08   | 85674.57 | 86135.95 | 87330.31     | 87404.76 | 82738.06 | 87405.53318 |
| 26 | 87819.14   | 85742.29 | 86231.55 | 87514.11     | 87591.45 | 82738.06 | 87592.25581 |
| 27 | 88014.36   | 85807.4  | 86324.73 | 87697.9      | 87778.14 | 82738.06 | 87778.97844 |
| 28 | 88209.91   | 85869.99 | 86415.53 | 87881.69     | 87964.83 | 82738.06 | 87965.70107 |

**Table S6: Riyadh actual cases**

|     | Interval#1 | Interval#2 | Interval#3 |
|-----|------------|------------|------------|
| DAY | Confirmed  | Confirmed  | Confirmed  |
| 1   | 75389      | 78193      | 82917      |
| 2   | 75435      | 78369      | 83081      |
| 3   | 75501      | 78537      | 83255      |
| 4   | 75559      | 78698      | 83430      |
| 5   | 75621      | 78865      | 83609      |
| 6   | 75688      | 79019      | 83751      |
| 7   | 75741      | 79170      | 83888      |
| 8   | 75827      | 79339      | 84032      |
| 9   | 75910      | 79504      | 84189      |
| 10  | 75998      | 79667      | 84348      |
| 11  | 76076      | 79838      | 84520      |
| 12  | 76158      | 80015      | 84685      |
| 13  | 76233      | 80189      | 84869      |
| 14  | 76311      | 80352      | 85028      |
| 15  | 76395      | 80538      | 85221      |
| 16  | 76480      | 80718      | 85425      |
| 17  | 76569      | 80902      | 85638      |
| 18  | 76674      | 81081      | 85864      |
| 19  | 76767      | 81248      | 86085      |
| 20  | 76866      | 81390      | 86302      |
| 21  | 76997      | 81526      | 86530      |
| 22  | 77121      | 81660      | 86764      |
| 23  | 77247      | 81822      | 87002      |
| 24  | 77381      | 82009      | 87340      |
| 25  | 77535      | 82192      | 87660      |
| 26  | 77688      | 82380      | 87979      |
| 27  | 77852      | 82548      | 88268      |
| 28  | 78020      | 82740      | 88631      |

## Supplemental R code

```
#install packages
library(forecast)

#Loading the dataset and defining the time series object
dt <- read.csv("KSA_ts_covid19.csv")
ksa_ts <- ts(dt$Confirmed, frequency = 365.25, start = c(2020, 84))

# Splitting the time series into training and testing sets
wholeset <- ts_split(ts.obj = ksa_ts, sample.out = 28)
#Training set
tts <- wholeset$train
#Testing set
testing28 <- wholeset$test

#Automatic ARIMA
model_arima <- auto.arima(tts, trace = TRUE)
forecast_arima <- forecast(model_arima, h = 28)
accuracy(forecast_arima,testing28)

#TBATS
model_tbats <- tbats(tts)
forecast_tbats <- forecast :: forecast(model_tbats, h = 28)
accuracy(forecast_tbats,testing28)

#ETS
model_ets <- ets(tts)
forecast_ets = forecast(model_ets, h=28)
accuracy(forecast_ets, testing28)

#Cubic smoothing spline
forecast_spline <- splinef(tts, h=28)
accuracy(forecast_spline, testing28)

#Holt
holtts <- holt(tts, h = 28)
accuracy(holtts, testing28)

#HoltWinters
model_hw <- HoltWinters(tts, gamma = FALSE)
hwforecast <- forecast(model_hw, h=28 )
accuracy(hwforecast,testing28 )

#SES
sests <- ses(tts, h = 28)
accuracy(sests, testing28)

#The analysis was repeated for all periods after incorporating the historical data of the previous
period(s).
```
